# Supplementary material for: Biogenic carbon pool production maintains the Southern Ocean carbon sink
Source: PubMed Central journal article supplement — Proc Natl Acad Sci U S A. 2023 Apr 26;120(18):e2217909120. doi: 10.1073/pnas.2217909120 (PMC10160987; doi:10.1073/pnas.2217909120), 2023-04-26
Supplement: pnas.2217909120.sapp.pdf [file pnas.2217909120.sapp.pdf]

## Supporting Information

### Biogenic Carbon Pool Production Maintains the Southern Ocean Carbon Sink

Yibin Huang<sup>1,2</sup>, Andrea J. Fassbender<sup>2,1\*</sup>, Seth M. Bushinsky<sup>3</sup>

<sup>1</sup>Department of Ocean Sciences, University of California, Santa Cruz, CA, USA, 95064

<sup>2</sup>NOAA/OAR Pacific Marine Environmental Laboratory, Seattle, WA, USA, 98115

<sup>3</sup>Department of Oceanography, University of Hawaii at Mānoa, Honolulu, HA, USA, 96822

\*Correspondence to: A. J. Fassbender, [andrea.j.fassbender@noaa.gov](mailto:andrea.j.fassbender@noaa.gov)

#### This PDF file includes:

Supplementary text 1 to 1.8;

Figure S1 to S24;

Table S1 to S3;

SI References

## 44 Supplementary Text

### 45 1.1 Constraining the C:N Ratio of Dissolved Organic Matter (C:N<sub>DOM</sub>) Production

46

47 C:N<sub>DOM</sub> is constrained using a recently published compilation of global shipboard  
48 observations (Hansell et al., 2021; **Fig. S18a**) that includes concurrent measurements of dissolved  
49 organic carbon (DOC), total dissolved nitrogen (TDN), and inorganic nitrogen (IN: including  
50 nitrate and nitrite). Dissolved organic nitrogen (DON) is computed by subtracting IN from TDN.  
51 In seawater, a considerable fraction of TDN is attributed to IN, particularly in high-latitude regions.  
52 Thus, the DON values derived by differencing two large values may be subject to a significant  
53 error. Unfortunately, accuracies for TDN and IN are not reported in the compiled dataset. We use  
54 an analytical error of 4% for TND and 2% for IN measurements to approximate the propagated  
55 error associated with our DON estimate ( $\sigma_{\text{DON}}$ , **Eq. S7**):

56

$$57 \sigma_{\text{DON}} = \sqrt{(\text{TND} \times 0.04)^2 + (\text{IN} \times 0.02)^2} \quad \text{Eq. S7}$$

58

59 We discard all DON values below  $\sigma_{\text{DON}}$ .

60

61 Since a large fraction of DOM is refractory (1), the C:N ratio of the bulk DOM pool does not  
62 reflect the labile DOM production ratio. Thus, we estimate the C:N<sub>DOM</sub> for labile DOM production  
63 using the seasonal DOC and DON inventory changes. Since the DOM seasonal cycle is rarely  
64 resolved (i.e., there are few wintertime observations), we use two approaches to infer the  
65 wintertime DOM value (DOM<sub>winter</sub>) using summertime DOM (DOM<sub>summer</sub>) observations. The  
66 first method is to set DOM<sub>winter</sub> to the mean of DOM<sub>summer</sub> values above the annual maximum  
67 MLD (MLD<sub>max</sub>) following Baetge, *et al.* (2) (**Eq. S8**):

68

$$69 \text{DOM}_{\text{winter}} = \frac{\int_0^{\text{MLD}_{\text{max}}} \text{DOM}_{\text{summer}} dz}{\text{MLD}_{\text{max}}} \quad \text{Eq. S8}$$

70

71 where MLD<sub>max</sub> is determined using an existing monthly Argo climatology product (3). A visual  
72 example of this method is shown **Fig. S21**. The second method is to assume that DOM<sub>winter</sub> is  
73 equivalent to the DOM<sub>summer</sub> profile concentration at the base of annual MLD<sub>max</sub> (4). After  
74 estimating DOM<sub>winter</sub>, we can calculate the seasonal change in DOC and DON within  $z_{\text{eu}}$  to  
75 quantify C: N<sub>DOM</sub> (**Eq. S9**):

76

$$77 \text{C: N}_{\text{DOM}} = \frac{\frac{\Delta \text{DOC}}{\int_0^{z_{\text{eu}}} \text{DOC}_{\text{summer}} dz - z_{\text{eu}} \times \text{DOC}_{\text{winter}}}}{\frac{\Delta \text{DON}}{\int_0^{z_{\text{eu}}} \text{DON}_{\text{summer}} dz - z_{\text{eu}} \times \text{DON}_{\text{winter}}}} \quad \text{Eq. S9}$$

78

79 Before averaging the C: N<sub>DOM</sub> values into 5° meridional bins, we remove implausible values  
80 (e.g., <5 or >25) that we attribute to unresolved horizontal advection or EP effects. The meridional  
81 patterns of C: N<sub>DOM</sub> derived from the two DOM<sub>winter</sub> reconstruction approaches generally agree  
82 within their uncertainties (**Fig. S18b**). In this study, we use the C: N<sub>DOM</sub> values derived from the  
83 Baetge, *et al.* (2) approach as the subsequent carbon pool partitioning results exhibit better  
84 agreement with ship-board observations (**Fig. 2d in the main text**).

## 86 1.2 Compilation of Shipboard Measurements of Sinking Particle Flux

87 We compile published shipboard observations of POC and PIC sinking flux ( $F_{\text{POC}}$  and  $F_{\text{PIC}}$ )  
 88 determined by  $^{234}\text{Th}$ - $^{238}\text{U}$  disequilibrium in the SO during the productive season (**Fig. S20**; Henson,  
 89 *et al.* (5), Le Moigne, *et al.* (6), Rosengard, *et al.* (7)). In these compiled dataset,  $F_{\text{PIC}}$  is estimated  
 90 from  $F_{\text{POC}}$  multiplied by the PIC:POC ratio determined from contemporaneous observations of  
 91 suspended particles (7). To maintain a consistent integration depth, we scale the  $F_{\text{POC}}$  and  $F_{\text{PIC}}$   
 92 values measured at different depth horizons to the base of  $z_{\text{eu}}$  using the Martin Curve and applying  
 93 a global average attenuation coefficient ( $b$ ) of 0.84 (8). The  $z_{\text{eu}}$  normalized  $F_{\text{POC}}$  and  $F_{\text{PIC}}$  values  
 94 are then averaged into  $5^\circ$  meridional bins. Finally, the seasonal flux is inferred as  $F_{\text{POC}}$  multiplied  
 95 by the average number of days in the productive season at each latitude band (**Fig. S1b**), assuming  
 96 a steady flux over the course of the productive season.  
 97

## 98 1.3 Residual Potential Nitrate Growth Rate and Dissolved Iron

99 We analyze the meridional pattern of Residual Potential Nitrate Growth (RNPG, (9)) and  
 100 dissolved iron to gain insight into the environmental conditions that may favor coccolithophore  
 101 blooms. RNPG is an index describing the residual potential growth rate for nitrate-dependent algae  
 102 ( $\mu_{\text{NO}_3^-}$ ) relative to silicate-dependent algae ( $\mu_{\text{Si}}$ ), under the observed nutrient conditions (9, 10)  
 103 (**Eq. S15**):  
 104

$$105 \text{RNPG} = \mu_{\text{NO}_3^-} - \mu_{\text{Si}} \quad \text{Eq. S15}$$

106  
 107 The sign of RNPG indicates which type of algal group is expected to outcompete the other,  
 108 assuming trace metal limitation is relieved.  $\mu_{\text{NO}_3^-}$  can be modeled as the Michaelis-Menten  
 109 formulation (**Eq. S16**):  
 110

$$111 \mu_{\text{NO}_3^-} = \mu_{\text{NO}_3^-_{\text{max}}} \times \frac{\text{NO}_3^-}{K_{\text{NO}_3^-_{\text{max}}} + \text{NO}_3^-} \quad \text{Eq. S16}$$

112  
 113 where  $\mu_{\text{NO}_3^-_{\text{max}}}$  represents the maximum nitrate-dependent growth rate in the absence of substrate  
 114 limitation,  $K_{\text{NO}_3^-_{\text{max}}}$  is the half-saturation coefficient for the growth, and  $\text{NO}_3^-$  is the seawater  
 115 concentration from float measurements. Unlike with  $\text{NO}_3^-$ , it is thought that phytoplankton are  
 116 unable to fully exhaust seawater silicate (Si). Thereby, a residual Si term ( $\text{Si}_0$ ) is added in the  $\mu_{\text{Si}}$   
 117 parameterization as follows (**Eq. S17**):  
 118

$$119 \mu_{\text{Si}} = \mu_{\text{Si}_{\text{max}}} \times \frac{\text{Si} - \text{Si}_0}{K_{\text{Si}_{\text{max}}} + \text{Si}_0} \quad \text{Eq. S17}$$

120  
 121 where  $\text{Si}_0$  is set to  $0.7 \text{ umol L}^{-1}$  (9). We estimate seawater Si along the float trajectory using the  
 122 CANYON-B algorithm (11). The maximum growth and half-saturation coefficient are dependent  
 123 on the nutrient condition, which can be modeled as a function of substrate concentration (S,  
 124 corresponding to seawater  $\text{NO}_3^-$  and Si concentration in our study, **Eq. S18, and Eq. S19**):  
 125

126  
127  
128  
129  
130  
131  
132  
133  
134  
135  
136  
137  
138  
139  
140  
141  
142  
143  
144  
145  
146  
147  
148  
149  
150  
151  
152  
153  
154  
155  
156  
157  
158  
159  
160  
161  
162  
163  
164  
165  
166  
167  
168

$$\mu_{S\_max} = \frac{S}{S+2} \times 3 \quad \text{Eq. S18}$$

$$K_S = \frac{S}{S+3} \times 5.5 \quad \text{Eq. S19}$$

Dissolved iron concentrations are extracted from a gridded, global, monthly climatology product that was created using machine learning to gap fill shipboard observations (12). We interpolate the dissolved iron product in 3-dimensions (location, time, and sampling depth) to align with each float profile before averaging the result into 5° meridional bins for comparison with our PIC production estimates (Fig. S7).

#### 1.4 Annual CO<sub>2</sub> Flux Estimate in the Southern Ocean and Comparison with Prior Studies

Our float-based estimate of the annual Southern Ocean (south of 35°S) carbon sink ( $F_{CO_2}$ ;  $-0.43 \pm 0.14$  Pg C yr<sup>-1</sup>; where negative values indicate ocean carbon uptake) is larger in magnitude than prior float-based estimates ( $-0.08 \pm 0.55$  Pg C yr<sup>-1</sup>, Gray, *et al.* (13), and  $-0.35 \pm 0.19$  Pg C yr<sup>-1</sup>, Bushinsky, *et al.* (14)), indicating a stronger CO<sub>2</sub> sink. This is somewhat surprising because, unlike prior studies that applied a pH-dependent pH adjustment to quality-controlled pH values that yields lower  $pCO_2$  estimates, we expected to find a weaker annual CO<sub>2</sub> sink in the Southern Ocean. However, it is worth noting that prior studies relied on float observations from May 2014 to April 2017, reflecting significantly fewer observations than our study. To test the importance of data density, we recalculate  $F_{CO_2}$  using only the float observations from May 2014 to April 2017 and replicating all flux calculation procedures from prior studies (13) except for the pH-dependent pH adjustment. This includes the use of ERA-interim wind speed and the division of the Southern Ocean into five frontal regions, with the PAZ further partitioned into the PFZ and ASZ. We find the SO to be a source of CO<sub>2</sub> to the atmosphere ( $+0.28 \pm 0.076$  Pg C yr<sup>-1</sup>), matching expectations. Recent finding by Stammerjohn, *et al.* (15) similarly found that greater data coverage from the current, larger float array leads to an elevated SO CO<sub>2</sub> sink estimate. Therefore, the difference in data coverage and/or inter-annual variability could be contributing to the larger SO CO<sub>2</sub> uptake found in our work using float observations from 2014 to 2021.

Notably, our float-based SO  $F_{CO_2}$  estimate still suggests a weaker annual sink than estimates derived from shipboard observations upscaled to the entire SO using machine learning techniques ( $\sim -1.1$  Pg C yr<sup>-1</sup> in the south of 35°S) (14, 16, 17). These gap-filled data products have known seasonal sampling biases in their training datasets due to a lack of wintertime observations in high-latitude regions that are anticipated to exhibit strong seasonal CO<sub>2</sub> outgassing (13, 18). A recent study by Long, *et al.* (19), using atmospheric CO<sub>2</sub> gradient observations from aircraft, reported nearly double the CO<sub>2</sub> influx ( $-0.53 \pm 0.23$  Pg C yr<sup>-1</sup>; average over 2009-2018) of our float-based estimate in the region south of 45° S ( $-0.26 \pm 0.07$  Pg C yr<sup>-1</sup>). Further study is needed to reduce the uncertainty in Southern Ocean  $F_{CO_2}$  estimates by considering potential discrepancies in methodology, inter-annual variability, and sampling coverage.

#### 1.5 Potential Biases in Float-based POC and PIC Estimates and the Implications in Carbon Pool Partitioning

169 Float-based POC concentrations ( $\text{POC}_{\text{b}_{\text{bp}}}$ ) in our study are derived from float  $\text{b}_{\text{bp}}$  observations  
 170 using a global empirical relationship (20). This might not be suitable in regions with  
 171 coccolithophore blooms (e.g., 47-57 °S in our study, **Fig. S7**) where highly-refractive calcite  
 172 particles (coccoliths) could lead to elevated  $\text{b}_{\text{bp}}$  signals (9). Such a bias in our  $\text{POC}_{\text{b}_{\text{bp}}}$  estimate  
 173 could distort the magnitude and meridional pattern of net biological production solved from the  
 174  $\text{POC}_{\text{b}_{\text{bp}}}$  budget  $\left(\frac{\partial \text{POC}_{\text{b}_{\text{bp}}}}{\partial t}\right)_{\text{Bio}}$ . Further, since the net biological production of suspended PIC  
 175  $\left(\frac{\partial \text{PIC}_{\text{b}_{\text{bp}}}}{\partial t}\right)_{\text{Bio}}$  is calculated from  $\frac{\partial \text{POC}_{\text{b}_{\text{bp}}}}{\partial t}\bigg|_{\text{Bio}}$  multiplied by the satellite derived surface PIC:POC  
 176 ratio (**Eq. 7** in the main text),  $\frac{\partial \text{PIC}_{\text{b}_{\text{bp}}}}{\partial t}\bigg|_{\text{Bio}}$  will be influenced by the assumption of a constant  
 177 PIC:POC ratio throughout the euphotic zone column.

178 Our work focuses on variability in the export potential of distinct biogenic carbon pools  
 179  $\left(\frac{\partial \text{DIC}}{\partial t}\bigg|_{\text{Bio\_POC}}, \frac{\partial \text{DIC}}{\partial t}\bigg|_{\text{Bio\_DOC}}, \frac{\partial \text{DIC}}{\partial t}\bigg|_{\text{Bio\_PIC}}\right)$  and the associated particle sinking fluxes ( $F_{\text{POC}}$  and  $F_{\text{PIC}}$ ).  
 180 The former relies on linking multiple chemical tracer budgets (**Eq. 4-5 in the main text**), which  
 181 eliminates the relevance of a potential  $\text{POC}_{\text{b}_{\text{bp}}}$  and  $\text{PIC}_{\text{b}_{\text{bp}}}$  bias. However, such a bias would  
 182 propagate into the subsequent computations of  $F_{\text{POC}}$  and  $F_{\text{PIC}}$ , which are determined by subtracting  
 183  $\frac{\partial \text{POC}_{\text{b}_{\text{bp}}}}{\partial t}\bigg|_{\text{Bio}}$  (or  $\frac{\partial \text{PIC}_{\text{b}_{\text{bp}}}}{\partial t}\bigg|_{\text{Bio}}$ ) from  $\frac{\partial \text{DIC}}{\partial t}\bigg|_{\text{Bio\_POC}}$  (or  $\frac{\partial \text{DIC}}{\partial t}\bigg|_{\text{Bio\_PIC}}$ ). It is worth pointing out that the  
 184 magnitudes of biological terms solved from suspended particles are one-tenth of the corresponding  
 185 chemically derived export potential values (**Fig. S22**). Therefore,  $F_{\text{POC}}$  and  $F_{\text{PIC}}$  are less sensitive  
 186 to potential errors in the  $\text{POC}_{\text{b}_{\text{bp\_bio}}}$  and  $\text{PIC}_{\text{b}_{\text{bp\_bio}}}$  estimates.

187

## 188 1.6 Tracer Budgets

189 We use a 1-dimensional mass balance model approach to account for processes affecting the  
 190 time rate of concentration change ( $\text{mmol m}^{-3} \text{d}^{-1}$ ) of biologically relevant tracers (DIC, TA,  $\text{NO}_3^-$ ,  
 191 and  $\text{POC}_{\text{b}_{\text{bp}}}$ ) that are observed by profiling floats within the euphotic zone ( $z_{\text{eu}}$ ) (**Eq. S1**):

192

$$\begin{aligned}
 & \frac{dT_{(\text{DIC,TA,NO}_3^-, \text{POC}_{\text{b}_{\text{bp}}})}}{dt}\bigg|_{\text{Obs}_{z_{\text{eu}}}} = \\
 & \frac{\partial T_{(\text{DIC})}}{\partial t}\bigg|_{\text{Gas}_{z_{\text{eu}}}} + \frac{\partial T_{(\text{DIC,TA,NO}_3^-, \text{POC}_{\text{b}_{\text{bp}}})}}{\partial t}\bigg|_{\text{Phys}_{z_{\text{eu}}}} + \frac{\partial T_{(\text{DIC,TA,NO}_3^-, \text{POC}_{\text{b}_{\text{bp}}})}}{\partial t}\bigg|_{\text{EP}_{z_{\text{eu}}}} + \\
 & \frac{\partial T_{(\text{DIC,TA,NO}_3^-, \text{POC}_{\text{b}_{\text{bp}}})}}{\partial t}\bigg|_{\text{Bio}_{z_{\text{eu}}}} \quad \text{Eq. S1}
 \end{aligned}$$

196

197 where subscripts on the right-hand side represent air-sea gas exchange (Gas), physical transport  
 198 and mixing (Phys), evaporation and precipitation (EP), and biological activity (Bio), respectively.  
 199 The computation of air-sea gas exchange for the dissolved inorganic carbon (DIC) budget is  
 200 described in the methods section.

201 When  $z_{\text{eu}}$  is deeper than the mixed layer depth (MLD; defined by a temperature increase of  
 202 0.2 °C relative to the 10 m temperature, following de Boyer Montégut, *et al.* (21), physical  
 203 transport and mixing at the base of  $z_{\text{eu}}$  consists of diapycnal diffusion and wind-induced Ekman  
 204 pumping (shown here for DIC, **Eq. S2**):

205

206

$$\frac{\partial \text{DIC}}{\partial t} |_{\text{Phys}_{z_{\text{eu}}}} = \underbrace{\left( K_{z_{\text{zeu}}} \times \frac{\partial \text{DIC}}{\partial z} \Big|_{z_{\text{eu}}} \right)}_{\text{Diapycnal diffusion}} + \underbrace{\left( w_{z_{\text{eu}}} \times \int_0^{z_{\text{eu}}} \frac{\partial \text{DIC}}{dz} \right)}_{\text{Ekman pumping}} / z_{\text{eu}}; \text{ for } z_{\text{eu}} > \text{MLD} \quad \text{Eq. S2}$$

207

208

209

210

211

212

213

214

215

216

217

218

219

220

221

222

223

224

225

226

227

228

229

230

231

232

233

234

235

236

237

238

239

240

where  $K_{z_{\text{zeu}}}$  is the diapycnal diffusivity coefficient,  $\frac{\partial \text{DIC}}{\partial z} \Big|_{z_{\text{eu}}}$  is the vertical DIC gradient across  $z_{\text{eu}}$ ,  $w_{z_{\text{eu}}}$  is the Ekman pumping velocity computed from satellite-derived wind stress following Signorini, *et al.* (22), and  $\int_0^{z_{\text{eu}}} \frac{\partial \text{DIC}}{dz}$  is the depth integrated DIC vertical gradient. In this study, we set  $K_Z$  to  $10^{-4} \text{ m s}^{-2}$  at the base of the mixed layer (23) with an exponential decay to the background value of  $10^{-5} \text{ m s}^{-2}$  over 20 m following 1/e scaling (24). We recognize the present choice of  $K_Z$  is somewhat arbitrary. Nevertheless, our analysis focuses on the spring/summer season when the upper layer water column is stratified and stable. Therefore, we believe the diapycnal diffusion during this period is minimal and the magnitude of  $K_Z$  has a limited effect on the biological term estimate.

During periods when the MLD exceeds  $z_{\text{eu}}$ ,  $\frac{\partial \text{DIC}}{\partial t} |_{\text{Phys}_{z_{\text{eu}}}}$  is scaled from the physical transport and mixing at the base MLD  $\left( \frac{\partial \text{DIC}}{\partial t} |_{\text{Phys}_{\text{MLD}}} \right)$  by assuming the impacts of physical transport and mixing occurring at the base of MLD will be equally distributed throughout the entire mixed water column (**Eq. S3**):

$$\frac{\partial \text{DIC}}{\partial t} |_{\text{Phys}_{z_{\text{eu}}}} = \frac{\partial \text{DIC}}{\partial t} |_{\text{Phys}_{\text{MLD}}} \times \frac{z_{\text{eu}}}{\text{MLD}}; \text{ for } z_{\text{eu}} < \text{MLD} \quad \text{Eq. S3}$$

Compared with  $\frac{\partial \text{DIC}}{\partial t} |_{\text{Phys}_{z_{\text{eu}}}}$  shown in **Eq. S2**,  $\frac{\partial \text{DIC}}{\partial t} |_{\text{Phys}_{\text{MLD}}}$  encompasses an additional term, entrainment, to account for tracer changes induced by MLD changes (**Eq. S4**):

$$\frac{\partial \text{DIC}}{\partial t} |_{\text{Phys}_{\text{MLD}}} = \underbrace{\left( K_{z_{\text{MLD}}} \times \frac{\partial \text{DIC}}{\partial z} \Big|_{\text{MLD}} \right)}_{\text{Diapycnal diffusion}} + \underbrace{\left( w_{\text{MLD}} \times \int_0^{\text{MLD}} \frac{\partial \text{DIC}}{dz} \right)}_{\text{Ekman pumping}} + \underbrace{\left( \text{DIC}_{\text{base}} - \overline{\text{DIC}_{\text{MLD}}} \right) \times \frac{\partial \text{MLD}}{\partial t}}_{\text{Entrainment}} / \text{MLD}$$

**Eq. S4**

Entrainment can be modeled as a product of the MLD time rate of change  $\left( \frac{\partial \text{MLD}}{\partial t} \right)$  and the difference between the average DIC concentration within MLD  $\left( \overline{\text{DIC}_{\text{MLD}}} \right)$  and DIC concentration at the base of MLD  $\left( \text{DIC}_{\text{base}} \right)$ . The entrainment term is set to zero when the MLD shoals  $\left( \frac{\partial \text{MLD}}{\partial t} < 0 \right)$ .

The evaporation and precipitation term is quantified using the ratio of tracer to salinity at initial time  $t_1$   $\left( \frac{T_{(\text{DIC,TA,NO}_3^-, \text{POC}_{\text{bBP}})}}{\text{Sal}} \Big|_{t_1} \right)$  multiplied by the salinity time rate of change due to EP  $\left( \frac{\partial \text{Sal}}{\partial t} \Big|_{\text{EP}_{z_{\text{eu}}}} \right)$  (**Eq. S5**):

$$\frac{\partial T_{(\text{DIC,TA,NO}_3^-, \text{POC}_{\text{bBP}})}}{\partial t} \Big|_{\text{EP}_{z_{\text{eu}}}} = \frac{\partial \text{Sal}}{\partial t} \Big|_{\text{EP}_{z_{\text{eu}}}} \times \frac{T_{(\text{DIC,TA,NO}_3^-, \text{POC}_{\text{bBP}})}}{\text{Sal}} \Big|_{t_1} \quad \text{Eq. S5}$$

241  $\frac{\partial \text{Sal}}{\partial t} |_{\text{EP}_{\text{zeu}}}$  is computed from the difference between observed salinity changes and estimated  
 242 physically driven salinity changes (**Eq. S6**):

$$243 \quad \frac{\partial \text{Sal}}{\partial t} |_{\text{EP}_{\text{zeu}}} = \frac{\partial \text{Sal}}{\partial t} |_{\text{obs}_{\text{zeu}}} - \frac{\partial \text{Sal}}{\partial t} |_{\text{Phys}_{\text{zeu}}} \quad \text{Eq. S6}$$

244  
 245  
 246 After accounting for abiotic terms, the biological term can be calculated as a residual.

### 247 248 249 **1.7 Reconstruction of DIC and TA for Different Productivity Scenarios**

250 To assess the role of biology in maintaining the Southern Ocean carbon sink, we reconstruct  
 251 DIC and TA time series for different scenarios of modified productivity: only organic matter  
 252 production and zero biological production (abiotic). Float-derived DIC values ( $\text{DIC}_{\text{Obs}_n}$ ) can be  
 253 expressed as a sum of the DIC concentration at the start of the productive season ( $\text{DIC}_{\text{Obs}_1}$ ) and  
 254 the time integral of DIC changes from biology ( $\sum_{\text{day}_1}^{\text{day}_{n-1}} \frac{\partial \text{DIC}}{\partial t} |_{\text{Bio}}$ ), air-sea gas exchange  
 255 ( $\sum_{\text{day}_1}^{\text{day}_{n-1}} \frac{\partial \text{DIC}}{\partial t} |_{\text{Gas}}$ ), and other abiotic processes ( $\sum_{\text{day}_1}^{\text{day}_{n-1}} \frac{\partial \text{DIC}}{\partial t} |_{\text{Other}}$ ) including  
 256 evaporation/precipitation, and physical transport and mixing (**Eq. S10**):

$$257 \quad \text{DIC}_{\text{Obs}_n} = \text{DIC}_{\text{Obs}_1} + \sum_{\text{day}_1}^{\text{day}_{n-1}} \frac{\partial \text{DIC}}{\partial t} |_{\text{Bio}} + \sum_{\text{day}_1}^{\text{day}_{n-1}} \frac{\partial \text{DIC}}{\partial t} |_{\text{Gas}} + \sum_{\text{day}_1}^{\text{day}_{n-1}} \frac{\partial \text{DIC}}{\partial t} |_{\text{Other}} \quad \text{Eq. S10}$$

258  
 259 Likewise, the time-series of DIC in the reconstructed, abiotic ocean ( $\text{DIC}_{\text{abio}_n}$ ) can be written as  
 260 follows (**Eq. S11**):

$$261 \quad \text{DIC}_{\text{abiotic}_n} = \text{DIC}_{\text{Obs}_1} + \sum_{\text{day}_1}^{\text{day}_{n-1}} \frac{\partial \text{DIC}}{\partial t} |_{\text{Gas}_{\text{abiotic}}} + \sum_{\text{day}_1}^{\text{day}_{n-1}} \frac{\partial \text{DIC}}{\partial t} |_{\text{Other}_{\text{abiotic}}} \quad \text{Eq. S11}$$

262  
 263 For simplicity, we assume the “other” terms are equivalent between the observed and reconstructed  
 264 scenarios ( $\sum_{\text{day}_1}^{\text{day}_{n-1}} \frac{\partial \text{DIC}}{\partial t} |_{\text{Other}} \approx \sum_{\text{day}_1}^{\text{day}_{n-1}} \frac{\partial \text{DIC}}{\partial t} |_{\text{Other}_{\text{abiotic}}}$ ), and rearrange  $\text{DIC}_{\text{abio}_n}$  by linking **Eq.**  
 265 **S10** with **Eq. S11** (**Eq. S12**, same as **Eq. 12** in the main text):

$$266 \quad \text{DIC}_{\text{abiotic}_n} = \text{DIC}_{\text{Obs}_n} - \sum_{\text{day}_1}^{\text{day}_{n-1}} \frac{\partial \text{DIC}}{\partial t} |_{\text{Bio}} - \left( \sum_{\text{day}_1}^{\text{day}_{n-1}} \frac{\partial \text{DIC}}{\partial t} |_{\text{Gas}} - \sum_{\text{day}_1}^{\text{day}_{n-1}} \frac{\partial \text{DIC}}{\partial t} |_{\text{Gas}_{\text{abiotic}}} \right) \quad \text{Eq. S12}$$

267  
 268 As shown in **Eq. S12**, the abiotic DIC time series can be inferred from the float-derived DIC at the  
 269 corresponding time step, with an adjustment for the time integral of biological production and the  
 270 gas exchange difference between the two scenarios. A similar approach can be used to derive the  
 271 abiotic TA time series ( $\text{TA}_{\text{abiotic}_n}$ ), which excludes the influence of gas exchange (**Eq. S13**, same  
 272 as **Eq. 11** in the main text):

$$273 \quad \text{TA}_{\text{abiotic}_n} = \text{TA}_{\text{Obs}_n} - \sum_{\text{day}_1}^{\text{day}_{n-1}} \frac{\partial \text{TA}}{\partial t} |_{\text{Bio}} \quad \text{Eq. S13}$$

274  
275  
276  
277  
278  
279

280 Since  $TA_{Obs\_n}$  and  $\frac{\partial TA}{\partial t}|_{Bio\_n}$  are previously quantified terms, we can directly reconstruct  $TA_{abiotic}$   
 281 following **Eq. S13**.

282  
 283 The  $\frac{\partial DIC}{\partial t}|_{Gas\_abiotic}$  term required to compute  $DIC_{abiotic}$  in **Eq. S12** is determined iteratively.  
 284 For the initial time step ( $n=1$ ), we assume the DIC and TA concentrations and gas exchange terms  
 285 are identical between the observed (biotic) and reconstructed (abiotic) ocean ( $DIC_{abiotic\_1} =$   
 286  $DIC_{Obs\_1}$ ;  $TA_{abiotic\_1} = TA_{Obs\_1}$ ;  $\frac{\partial DIC}{\partial t}|_{Gas\_abiotic\_1} = \frac{\partial DIC}{\partial t}|_{Gas\_1}$ ). It follows that there is also no  
 287 difference between the biotic and abiotic gas exchange terms for the subsequent time step ( $n = 2$ ,  
 288 **Eq. S14**).

$$289 \quad DIC_{abiotic\_2} = DIC_{Obs\_2} - \sum_{day_1}^{day_1} \frac{\partial DIC}{\partial t}|_{Bio} - \underbrace{\left( \sum_{day_1}^{day_1} \frac{\partial DIC}{\partial t}|_{Gas} - \sum_{day_1}^{day_1} \frac{\partial DIC}{\partial t}|_{Gas\_abiotic} \right)}_{set\ to\ 0} \quad \text{Eq. S14}$$

290  
 291 With  $DIC_{abiotic\_2}$  and  $TA_{abiotic\_2}$  we can calculate the abiotic seawater partial pressure of  $CO_2$   
 292 ( $pCO_{2\_sea\_abiotic\_2}$ ) and the associated air-sea gas exchange ( $\frac{\partial DIC}{\partial t}|_{Gas\_abiotic\_2}$ ).  $DIC_{abiotic\_3}$ , and all  
 293 subsequent time steps, can then be computed following **Eq. S12**. Through this procedure, we  
 294 iteratively reconstruct the time-series of  $DIC_{abiotic}$ ,  $pCO_{2\_sea\_abiotic}$ , and  $\frac{\partial DIC}{\partial t}|_{Gas\_abiotic}$ . A visual  
 295 example of our reconstruction for different productivity scenarios is provided in **Fig. S23**.

296  
 297  
 298 We could infer  $DIC_{abiotic\_n}$  from  $DIC_{abiotic\_n-1} + \frac{\partial DIC}{\partial t}|_{Gas\_abiotic\_n-1}$ ; however, any biases in the  
 299 gas exchange estimates would accumulate iteratively, which could pull our abiotic terms far from  
 300 the starting DIC value. Considering that the gas exchange velocity ( $k$ ) used to parameterize air-sea  
 301  $CO_2$  flux has a ~30% uncertainty (25, 26), we opt for a method that starts with the float-based DIC  
 302 estimate at each time step to ensure we are not far from reality. This approach also ensures that  
 303  $pCO_2$  changes caused by other physical processes, such as horizontal advection, are not  
 304 unintentionally omitted.

### 305 306 **1.8 Exclusion of Additional pH-dependent pH Adjustment to Quality-controlled SOCCOM** 307 **Float pH for $pCO_2$ Computation**

308  
 309 The calculation of pH from DIC and TA does not always agree well with directly measured  
 310 pH values, and this bias can exhibit a pH dependency. Such a pH-dependent pH bias has been  
 311 identified in numerous high-quality shipboard datasets in which at least three carbonate chemistry  
 312 parameters (including pH) were measured (27-29). In effort to align float-based  $pCO_2$  estimates  
 313 with  $pCO_2$  values that would be computed from high-quality DIC and TA observations, a pH-  
 314 dependent pH adjustment (28) has been routinely applied to quality-controlled SOCCOM float pH  
 315 observations before computing the  $pCO_2$  values provided in SOCCOM data snapshots  
 316 (<https://socom.princeton.edu/content/data-access>). However, implementation of this adjustment  
 317 is based on the pH-dependent pH bias at 1500 m, which is then applied to the entire profile as an  
 318 offset. Thus, the pH adjustment is not applied in a pH-dependent manner and does not correct for  
 319 the issue presented in Williams, *et al.* (28) and Carter, *et al.* (27), Carter, *et al.* (29). Since 2019, a  
 320 collaborative international effort entitled the Ocean Carbonate System Intercomparison Forum  
 321 (OCSIF), supported by the U.S. Ocean Carbon and Biogeochemistry Program (



322 [ocb.org/ocean-carbonate-system-intercomparison-forum/](http://ocb.org/ocean-carbonate-system-intercomparison-forum/)), has focused on identifying the origin  
323 of the pH-dependent pH bias in high-quality shipboard observations. While efforts remain ongoing,  
324 the current OCSIF recommendation is to use the quality-controlled float pH data directly, without  
325 any type of additional pH adjustment, for computations of  $p\text{CO}_2$ .  
326

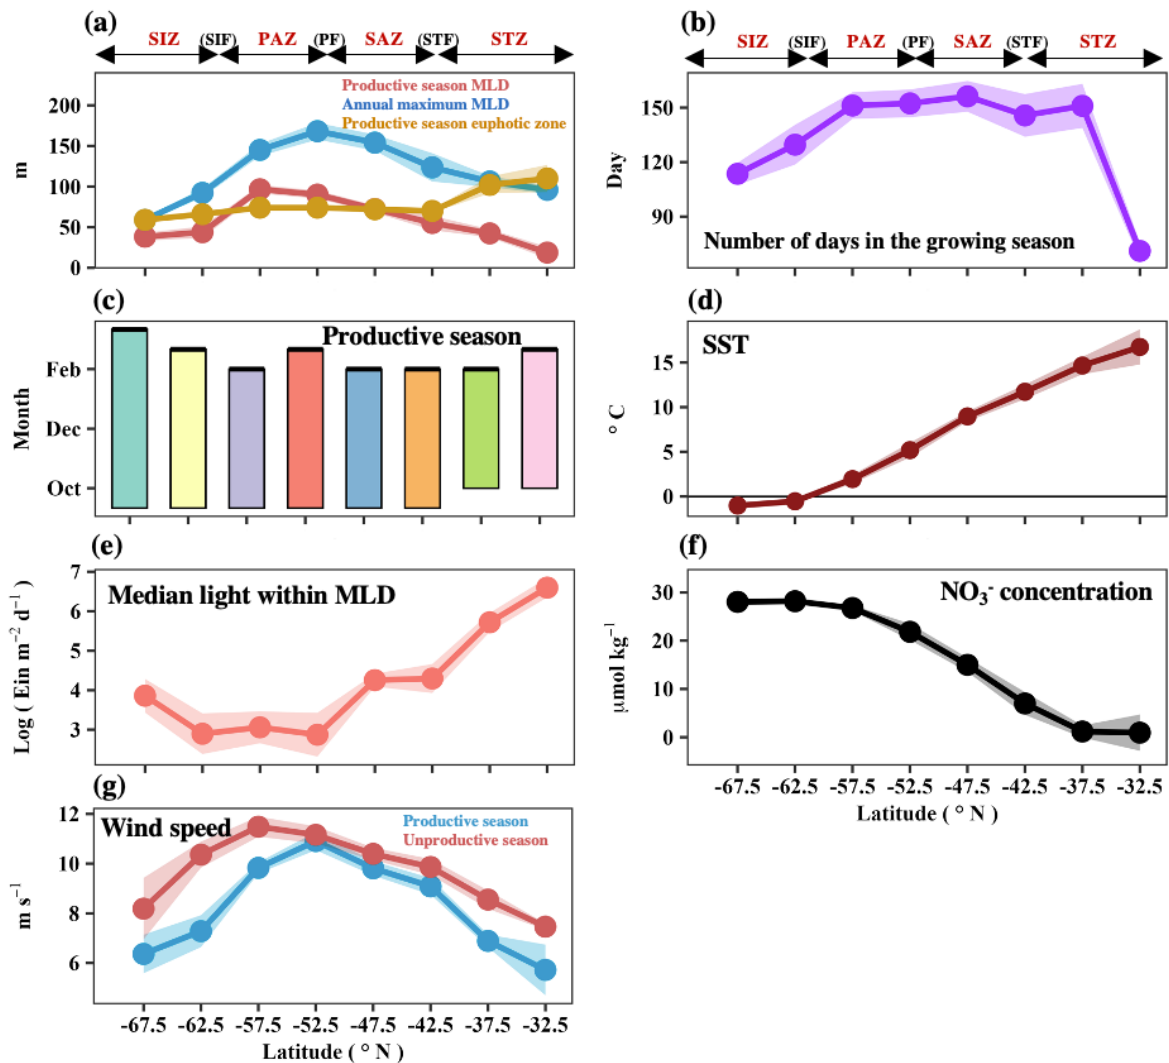

328

329

330

331

332

333

334

335

336

337

**Fig. S1** The meridional patterns of environmental parameters during the Southern Ocean productive season, where shading indicates the propagated error. Median light within mixed layer depth (MLD) is computed based on the remotely sensed surface light field and its attenuation as inferred from float Chl-*a* profiles (30). Note that the frontal labels depicted on the top of the panels indicate rough locations of frontal regions, with a more precise representation appearing in **Fig. S2a**. STF: subtropical front; STZ: subtropical zone; SAZ: subantarctic zone; PF: polar front; PAZ: polar Antarctic zone; SIF: seasonal ice front; SIZ: sea ice zone; SST: sea surface temperature;  $NO_3^-$ : nitrate; MLD: mixed layer depth.

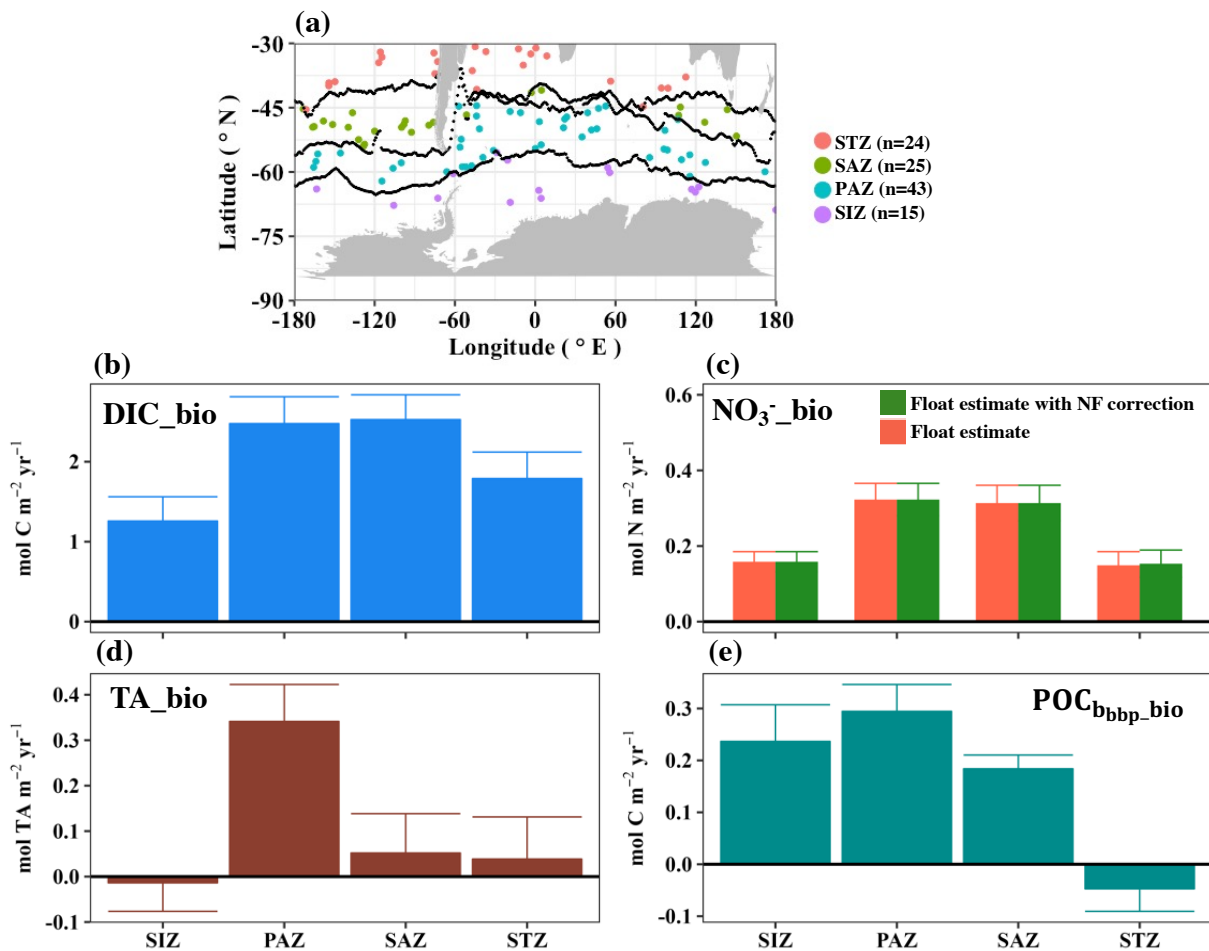

339  
 340 **Fig. S2** Net biological production during the Southern Ocean productive season as averaged across  
 341 the four main frontal zones. (a) Mean location of each float for each seasonal production estimate,  
 342 with frontal zones labeled. Net biological term (bio) results for each frontal region determined  
 343 from the (b) dissolved inorganic carbon (DIC), (c) nitrate (NO<sub>3</sub><sup>-</sup>), (d) total alkalinity (TA), and (e)  
 344 particulate organic carbon (derived from particle backscattering coefficient; POC<sub>bbbp</sub><sub>bio</sub>) tracer  
 345 budgets. Error bars represent the propagated errors. Numbers in panel a indicate how many  
 346 independent, float seasonal cycles were evaluated in each frontal zone. Zones as described in **Fig.**  
 347 **S1**. NF: nitrogen fixation.

348

349

350

351

352

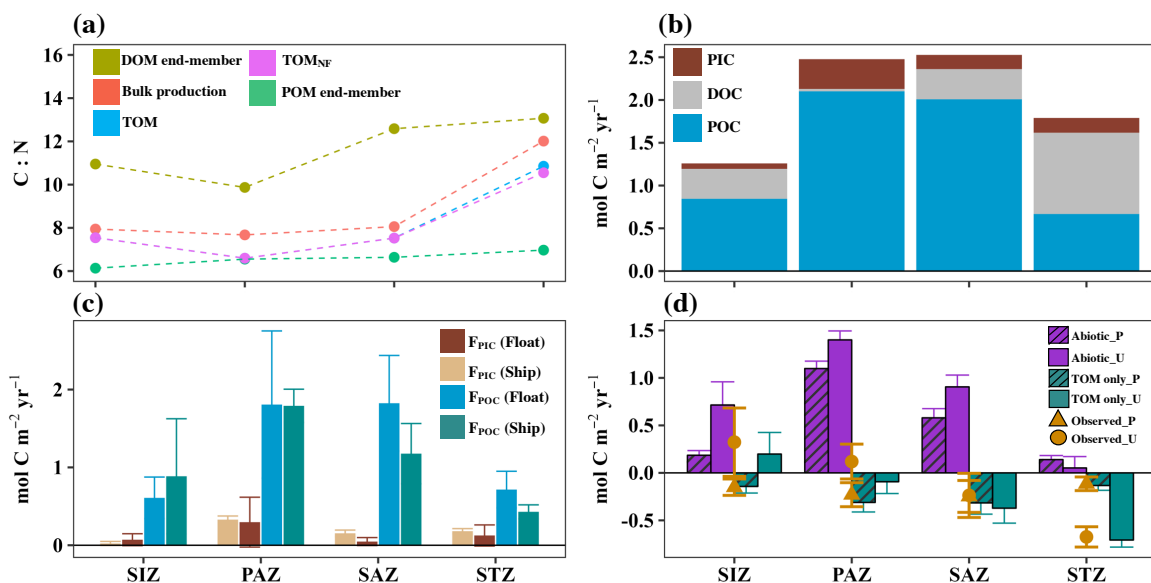

354  
 355 **Fig. S3** (a) C:N ratio for biological production of different carbon pools, (b) magnitude and  
 356 fraction of distinct carbon pool export potential, (c) sinking flux of particulate organic carbon (F<sub>POC</sub>)  
 357 and particulate inorganic carbon (F<sub>PIC</sub>) during the Southern Ocean productive season (P), and (d)  
 358 influence of biology on air-sea CO<sub>2</sub> exchange for different productivity scenarios as averaged over  
 359 the four main frontal zones. The dissolved organic matter (DOM) and particulate organic matter  
 360 (POM) end-member C:N ratios are derived from ship-based observations. The bulk biological  
 361 production, total organic matter (TOM) production, and TOM production with the correction for  
 362 nitrogen fixation (TOM<sub>NF</sub>) are derived from float observations and a biogeochemical inverse  
 363 model. Error bars represent the propagated errors. Positive values in panel d indicate a source of  
 364 carbon to the atmosphere. Zones as described in Fig. S1. DOM: dissolved organic matter; TOM:  
 365 total organic matter; PIC: particulate inorganic carbon; POM: particulate organic matter; DOC:  
 366 dissolved organic carbon; POC: particulate organic carbon. Abiotic: reconstructed, abiotic ocean;  
 367 TOM only: reconstructed ocean with only total organic carbon production; Observed: observed,  
 368 biotic ocean including both TOM and particulate inorganic carbon production. U: unproductive  
 369 season.

370

371

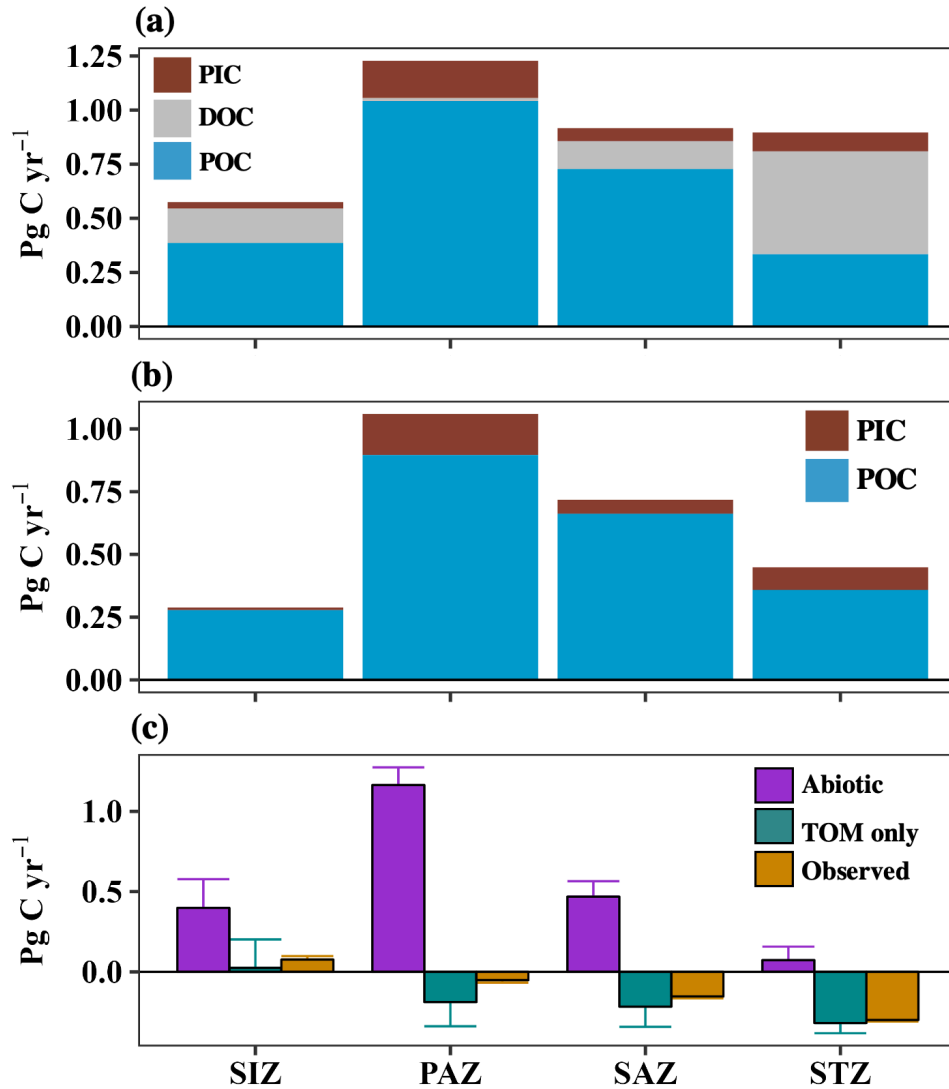

372  
 373 **Fig. S4** Area-weighted cumulative annual (a) magnitude and (b) fraction of distinct carbon pool  
 374 export potential, and (c) influence of biology on annual air-sea  $\text{CO}_2$  exchange for different  
 375 productivity scenarios as averaged over the four main frontal zones. Positive values in panel c  
 376 indicate a source of carbon to the atmosphere. Error bars represent the propagated errors. Zones as  
 377 described in **Fig. S1**. TOM: total organic matter; DOC: dissolved organic carbon. Note the annual  
 378 biological production estimate is scaled from the float-estimated biological production during the  
 379 productive season using data-constrained model estimates of the fraction of annual biological  
 380 production that occurs during the productive period at each float location (*Method and Material*  
 381 **in the main text**).

382  
 383

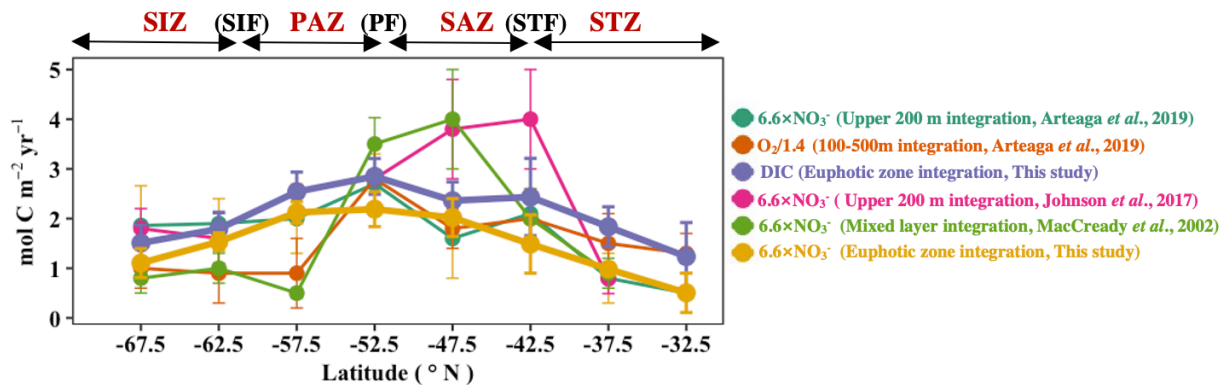

385

386

387

388

389

390

391

392

393

394

395

396

397

398

399

400

401

402

403

404

405

406

407

408

409

410

411

**Fig. S5** Comparison of seasonal export potential during the Southern Ocean productive season solved from multiple studies. Export potential values derived from nitrate and oxygen are converted to units of carbon using the Redfield ratio to facilitate comparison. Error bars represent the propagated errors. Zones as described in **Fig. S1**. NO<sub>3</sub><sup>-</sup>: nitrate; DIC: dissolved inorganic carbon; O<sub>2</sub>: oxygen.

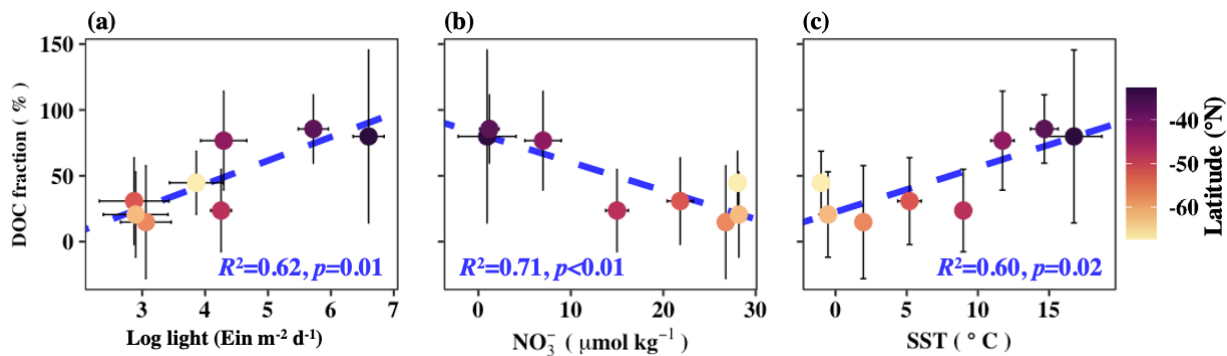

412  
 413 **Fig. S6** Relationships between the fraction of total carbon export potential attributed to dissolved  
 414 organic carbon (DOC) and various environmental parameters during the Southern Ocean  
 415 productive season. Light availability in panel a refers to the median light field within the mixed  
 416 layer (**Fig. S1e**). Error bars represent the propagated errors.  $\text{NO}_3^-$ : nitrate; SST: sea surface  
 417 temperature.

418  
 419  
 420  
 421  
 422  
 423  
 424  
 425  
 426  
 427  
 428  
 429  
 430  
 431  
 432

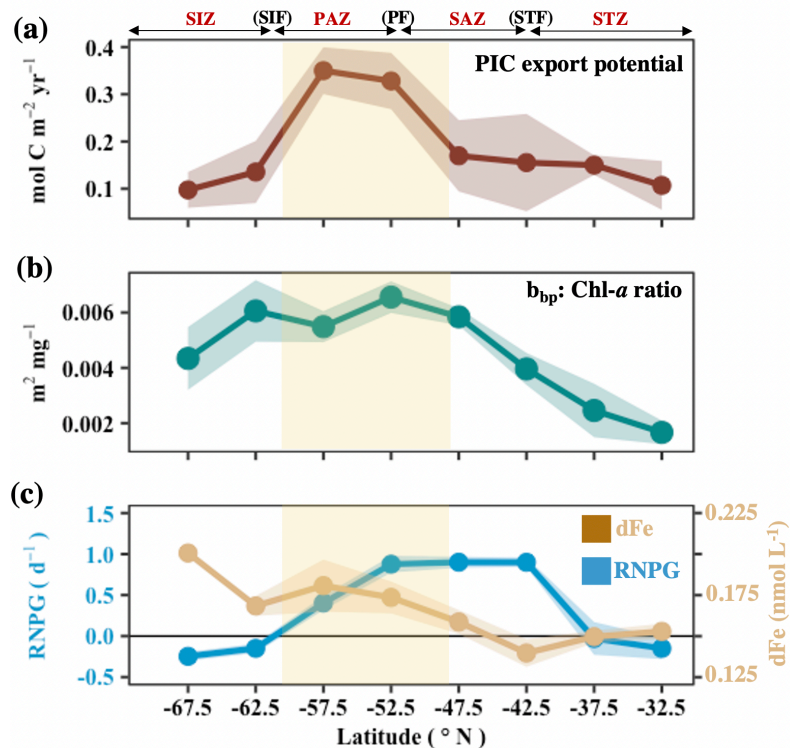

433  
 434 **Fig. S7** The meridional pattern of (a) seasonal particulate inorganic carbon (PIC) export potential,  
 435 (b) backscattering to Chlorophyll-*a* ratio ( $b_{bp}$ :Chl-*a*), and (c) dissolved iron (dFe) and residual  
 436 nitrate potential growth rate (RNPG; detailed description in **Text S1.3**) during the Southern Ocean  
 437 productive season. Yellow shading highlights the region with enhanced PIC production. Shading  
 438 on each line reflects the propagated error. Zones as described in **Fig. S1**.

439  
 440  
 441  
 442  
 443  
 444  
 445  
 446  
 447  
 448  
 449



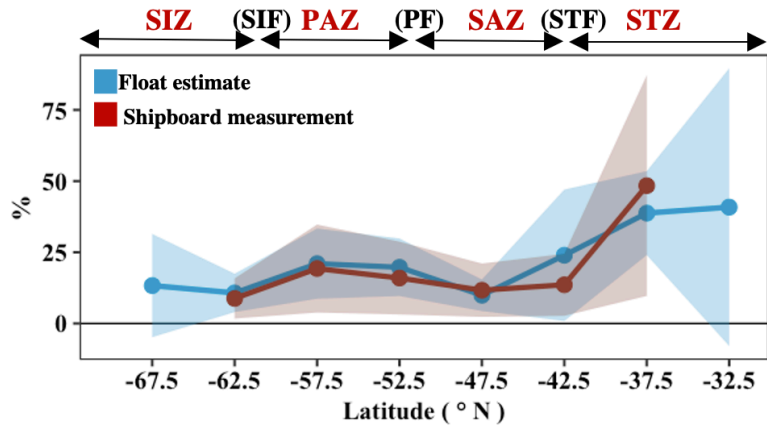

450  
 451  
 452  
 453  
 454  
 455  
 456  
 457  
 458  
 459  
 460  
 461  
 462  
 463  
 464  
 465  
 466  
 467

**Fig. S8** Meridional pattern (5° bin) of euphotic zone sinking particle rain ratio ( $F_{PIC}/F_{POC} \times 100\%$ ) during the Southern Ocean productive season. Shading reflects the propagated error. Zones as described in **Fig. S1**.

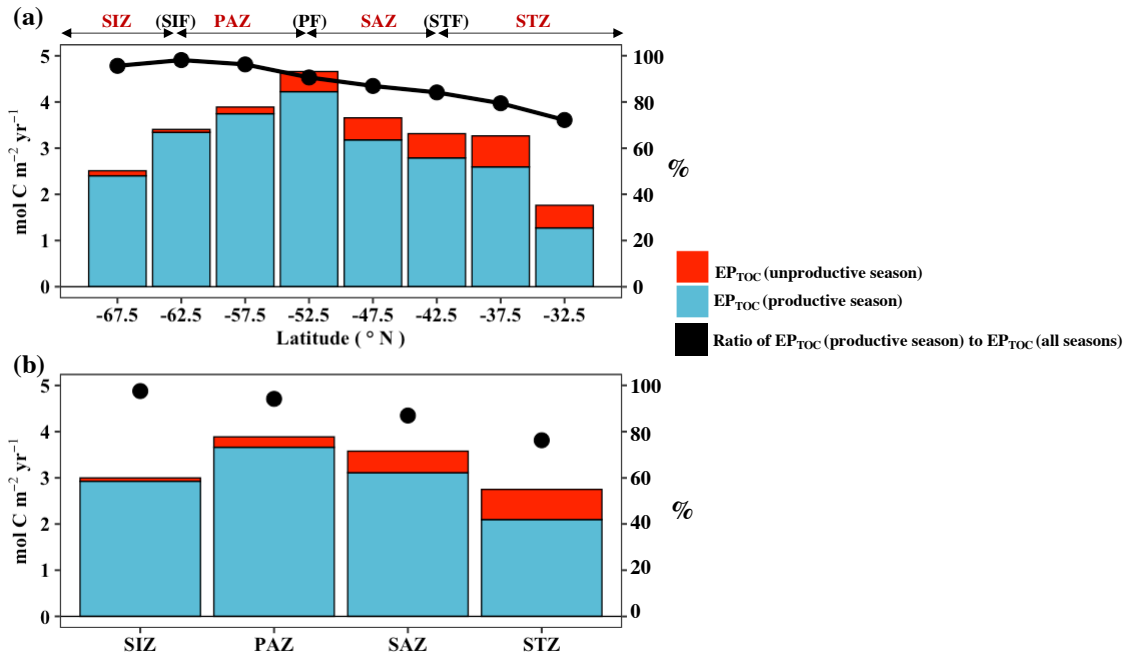

468  
 469 **Fig. S9** Year 2008 to 2018 average euphotic zone integrated export potential of total organic  
 470 carbon (EP<sub>TOC</sub>) in the Southern Ocean for the productive and unproductive seasons derived from  
 471 data-constrained biogeochemical Southern Ocean State Estimate (B-SOSE) model output (31).  
 472 Results are shown for (a) 5° latitude bins and (b) the four main frontal regions. Frontal regions as  
 473 described in **Fig. S1**.

474  
 475  
 476

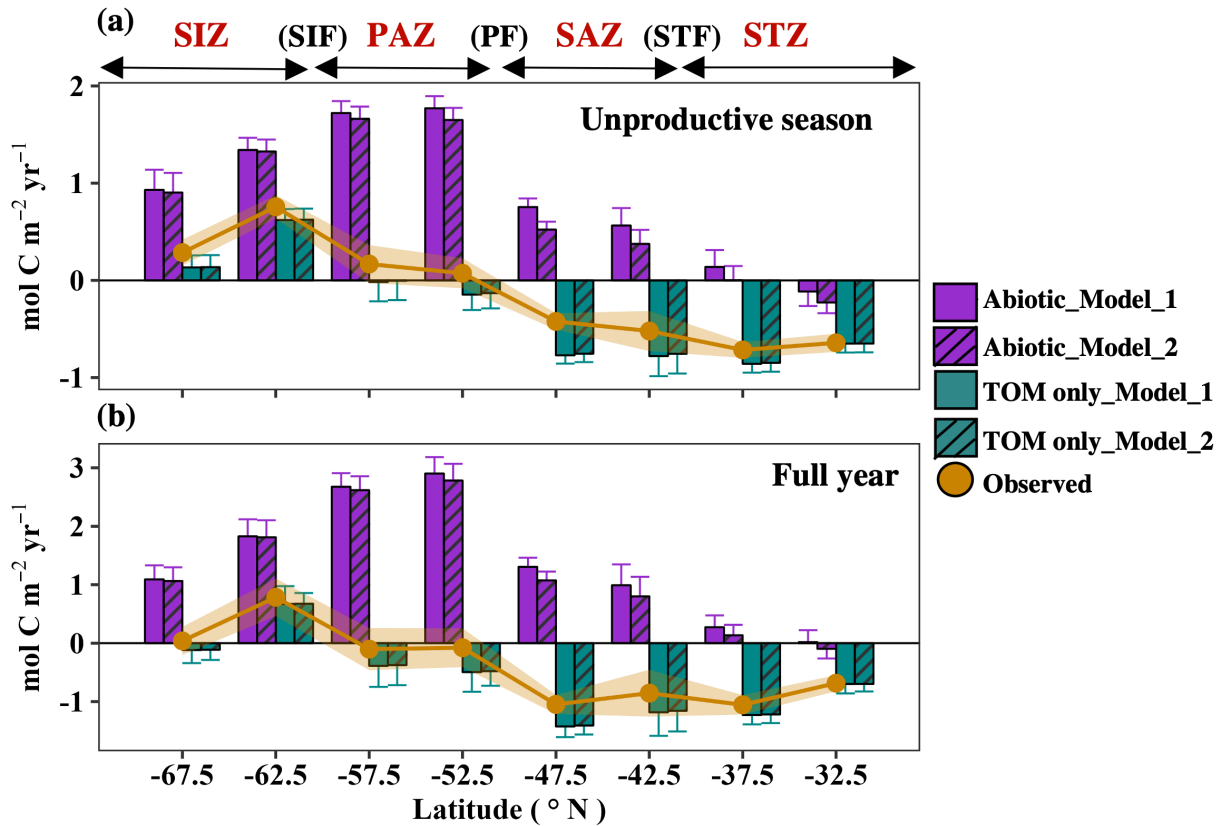

477  
 478 **Fig. S10** Time cumulative air-sea CO<sub>2</sub> gas flux for different productivity scenarios during the (a)  
 479 unproductive period and (b) the full year based on the different model settings. Gold lines show  
 480 the observed CO<sub>2</sub> fluxes. Frontal zones as described in **Fig. S1**. Positive values indicate a source  
 481 of carbon to the atmosphere. Error bars and shading represent the propagated uncertainty in each  
 482 scenario. Model 1 (adopted in the main text): reconstruction results the abiotic and TOM  
 483 production only scenarios in which the unproductive season contributes to the total annual  
 484 production (*Materials and Methods* in main text); Model 2: reconstruction results the abiotic and  
 485 TOM production only scenarios in which the unproductive season does not contribute to the total  
 486 annual production.  
 487  
 488

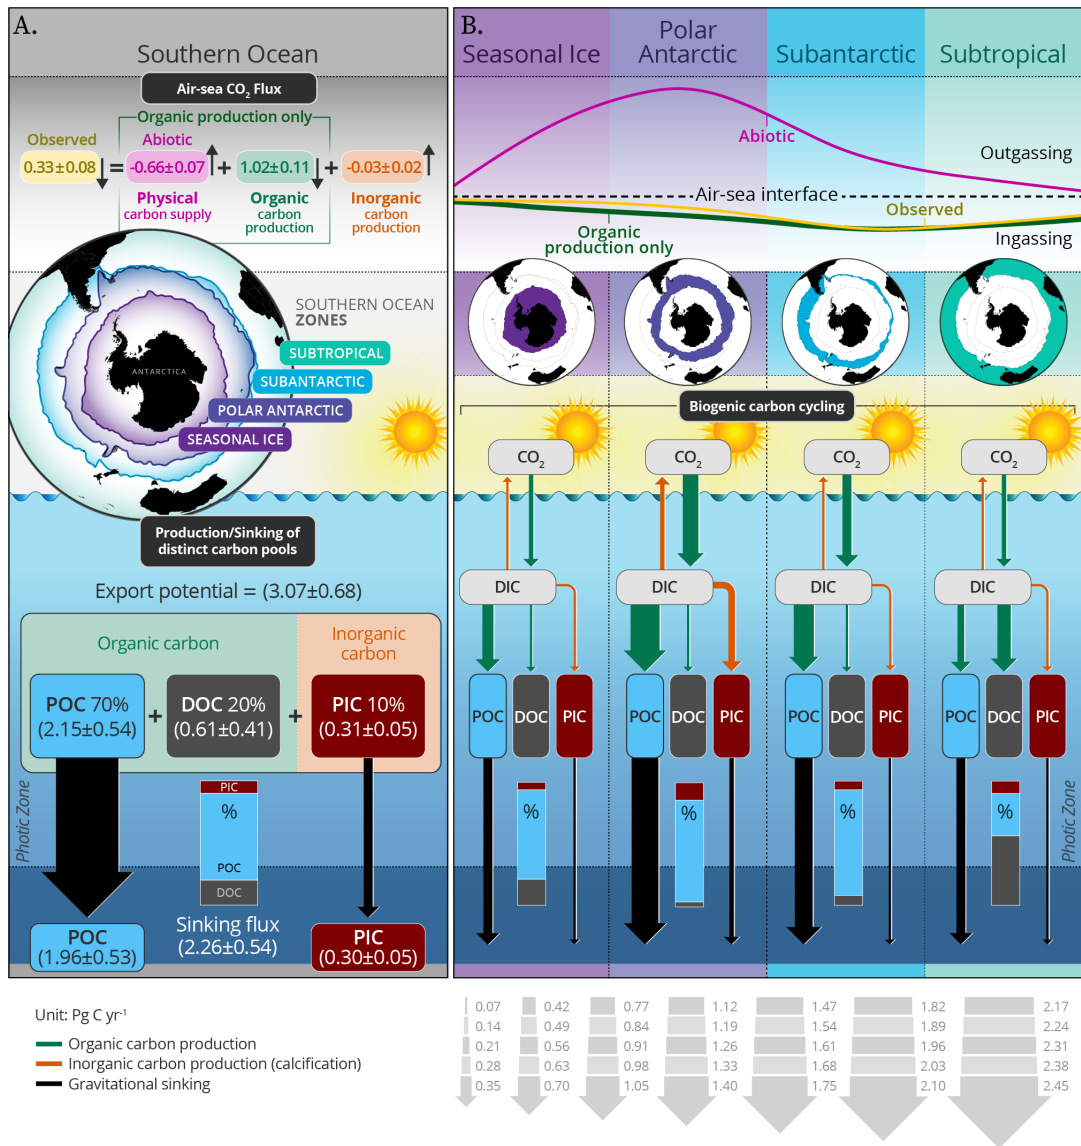

489  
490  
491  
492  
493  
494  
495  
496  
497  
498  
499  
500  
501  
502

**Fig. S11 Schematic of Southern Ocean carbon cycling during the productive season.** Contributions of distinct biogenic carbon pools to the total biological carbon production and the associated impacts on air-sea CO<sub>2</sub> flux. Arrow sizes are proportional to the area-weighted, cumulative carbon flux magnitude within each frontal zone. Inset bar plots show the percentage contributions of each biogenic carbon pool to the export potential.

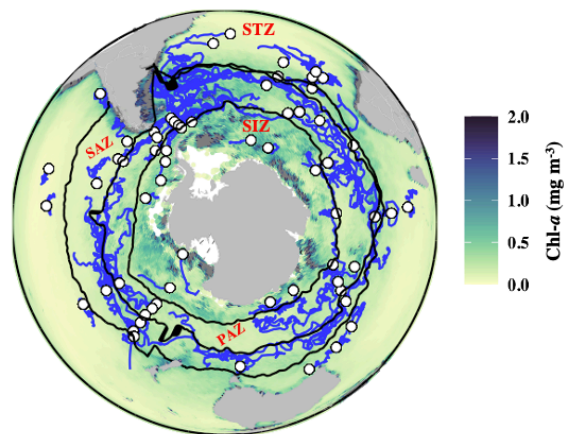

503 **Fig. S12** Trajectories of the floats used in this study. White dots show the deployment locations.  
 504 The background color shows a climatology of remotely sensed surface chlorophyll-*a* during austral  
 505 summer. Black lines show the climatological boundaries (mean of 2004–2014) of the Southern  
 506 Ocean fronts determined using an Argo-based climatology of temperature and salinity (32). Zones  
 507 as described in **Fig. S1**.  
 508

509  
 510  
 511  
 512  
 513  
 514  
 515  
 516  
 517  
 518  
 519  
 520  
 521  
 522  
 523  
 524  
 525  
 526

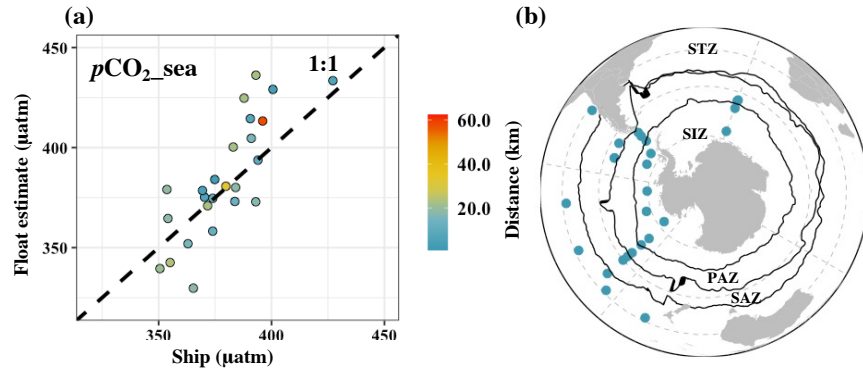

527  
 528 **Fig. S13 (a)** Comparison of the sea surface partial pressure of carbon dioxide ( $p\text{CO}_{2\_sea}$ ) from float  
 529 estimates and underway shipboard observations compiled in SOCAT (version 2022 (33)). **(b)** The  
 530 float and ship samples were paired based on location ( $\pm 0.2^\circ$ ) and sampling date ( $\pm 2$  days). The  
 531 color bar in **a** reflects the distance between ship and float samples. Frontal zones in panel **b** as  
 532 described in **Fig. S1**.

533  
 534  
 535  
 536  
 537  
 538  
 539  
 540  
 541  
 542  
 543  
 544  
 545  
 546  
 547  
 548

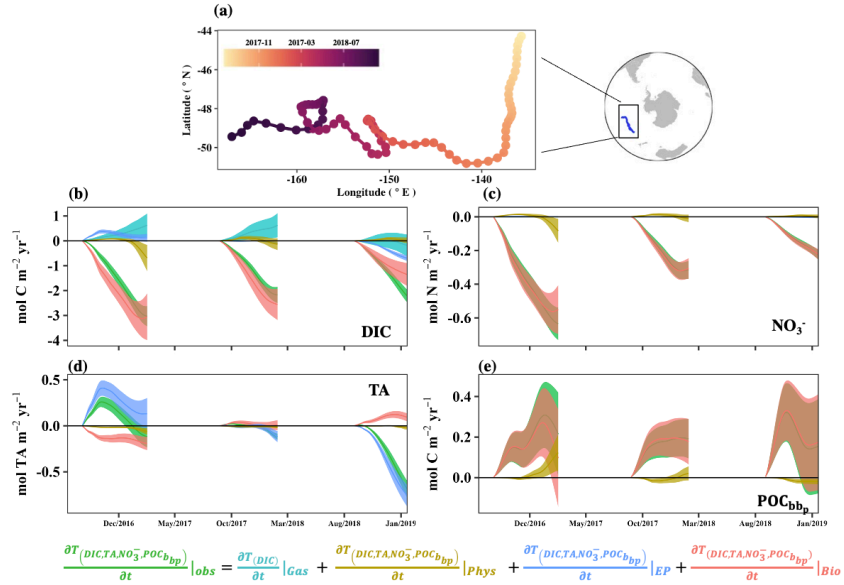

549  
 550  
 551  
 552  
 553  
 554  
 555  
 556  
 557  
 558

**Fig. S14** Time cumulative fluxes in each productive season within the euphotic zone (~77m) for a representative biogeochemical float (WMO ID: 5904761). Shading represents the propagated error. Positive values indicate the process causes an increase in the tracer inventory. DIC: dissolved inorganic carbon; NO<sub>3</sub><sup>-</sup>: nitrate; TA: total alkalinity; POC<sub>bbp</sub>: particulate organic carbon derived from the backscattering coefficient.

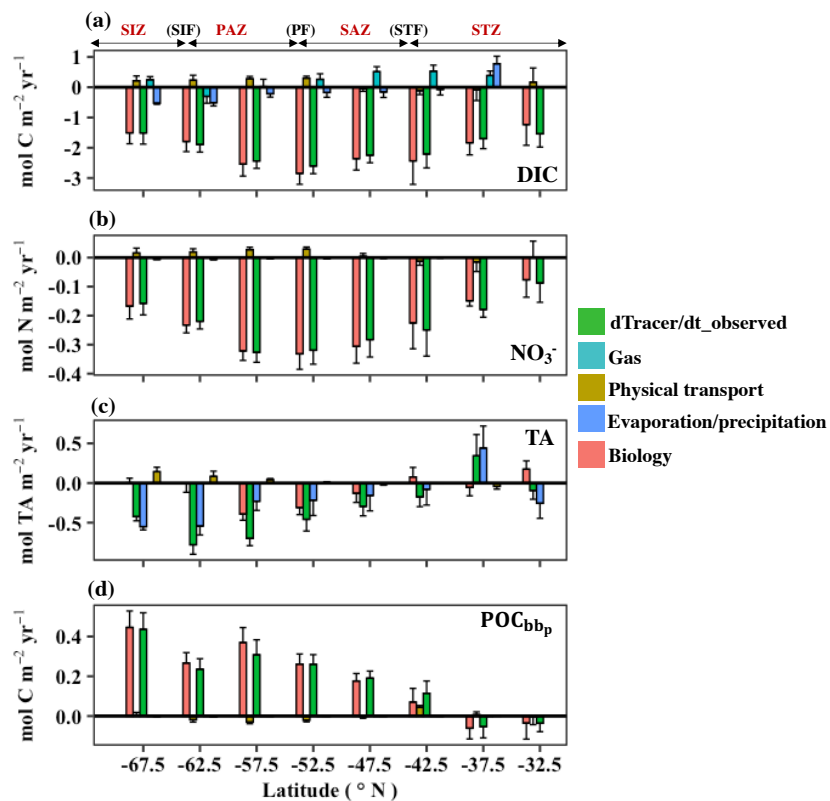

559  
 560 **Fig. S15** Meridional pattern (5° bin) of tracer budget integrated over the euphotic zone during the  
 561 Southern Ocean productive season. Error bars represent the propagated error. The positive value  
 562 indicates the process leads to an increase in the tracer inventory. DIC: dissolved inorganic carbon;  
 563 NO<sub>3</sub><sup>-</sup>: nitrate; TA: total alkalinity; POC<sub>bbp</sub> : particulate organic carbon derived from the  
 564 backscattering coefficient. Zones as described in **Fig. S1**.  
 565



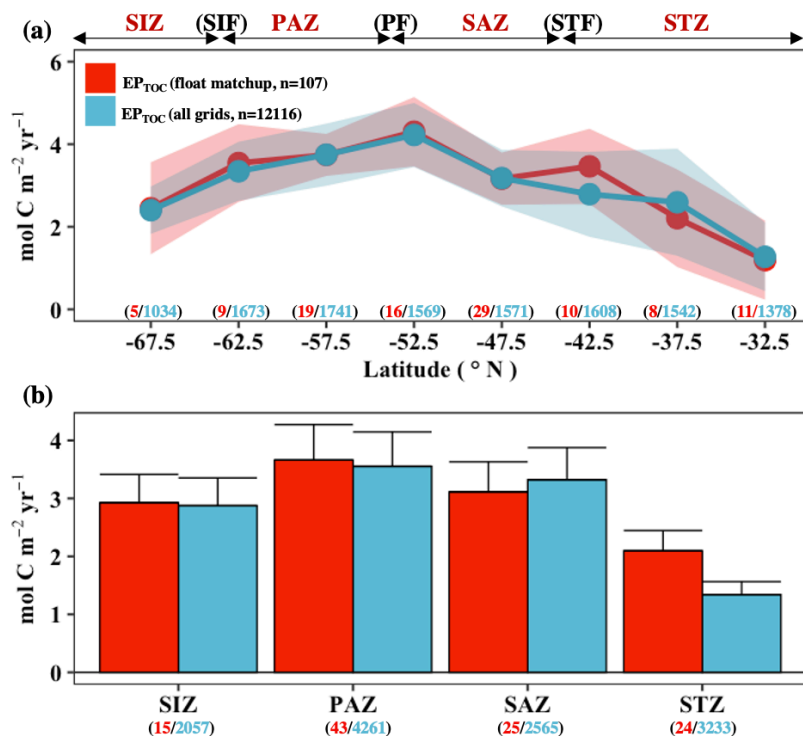

566  
 567  
 568  
 569  
 570  
 571  
 572  
 573  
 574  
 575  
 576  
 577

**Fig. S16** Evaluation, using data constrained biogeochemical Southern Ocean State Estimate (B-SOSE) model output (31), of how representative the float-based productivity estimates are of the entire Southern Ocean. Comparison of subsampled (along float trajectories) versus fully resolved (1°×1°) model fields of euphotic zone integrated export potential of total organic carbon ( $E_{TOC}$ ) during the productive season. Results are shown as an average (a) across meridional bands and (b) the four main frontal regions. Shading and error bars reflect spatial variability in  $EP_{TOC}$  within each sub-region. Red and blue numbers near the bottom of each panel show the number of grid points used in each sub-region for computing the average value. The frontal regions are as described in **Fig. S1**.

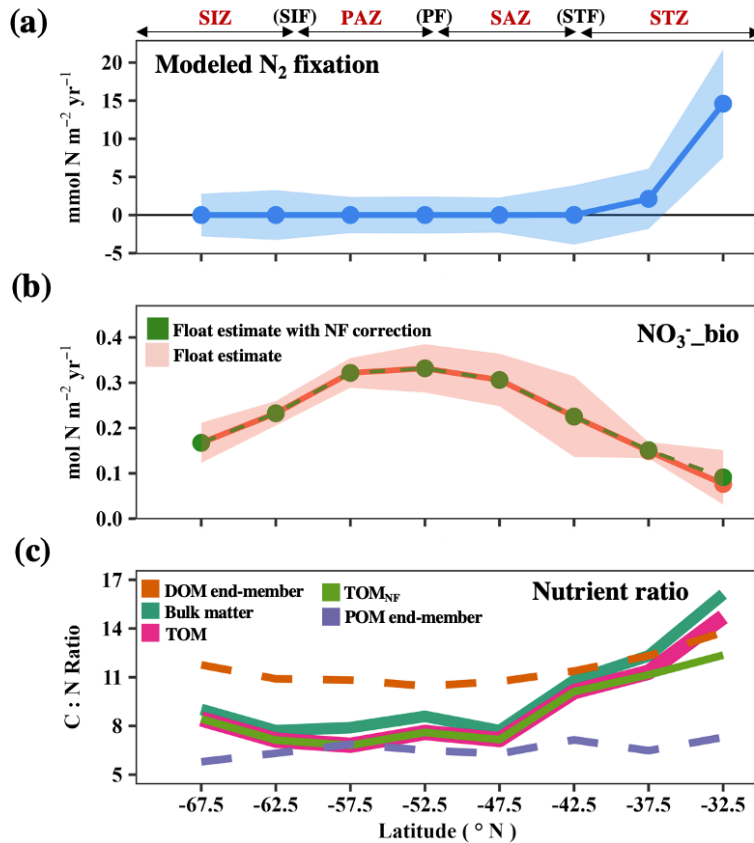

578  
 579 **Fig. S17** The meridional pattern of (a) climatology of nitrogen fixation (NF) derived from a data-  
 580 driven inverse model (34), and (b) net biological term solved from nitrate tracer budget ( $\text{NO}_3^-_{\text{bio}}$ ),  
 581 (c) carbon-to-nitrogen ratios (C:N) for biological production of different carbon pools during the  
 582 Southern Ocean productive season. The dissolved organic matter (DOM) and particulate organic  
 583 matter (POM) end-member C:N ratios are derived from the compilation of existing ship-based  
 584 observations. The bulk biological production, total organic matter (TOM) production, and TOM  
 585 production with the correction for nitrogen fixation ( $\text{TOM}_{\text{NF}}$ ) are derived from float observations  
 586 and a biogeochemical inverse model. Shading on each line reflects the propagated error. Zones as  
 587 described in Fig. S1.

588  
 589  
 590  
 591  
 592

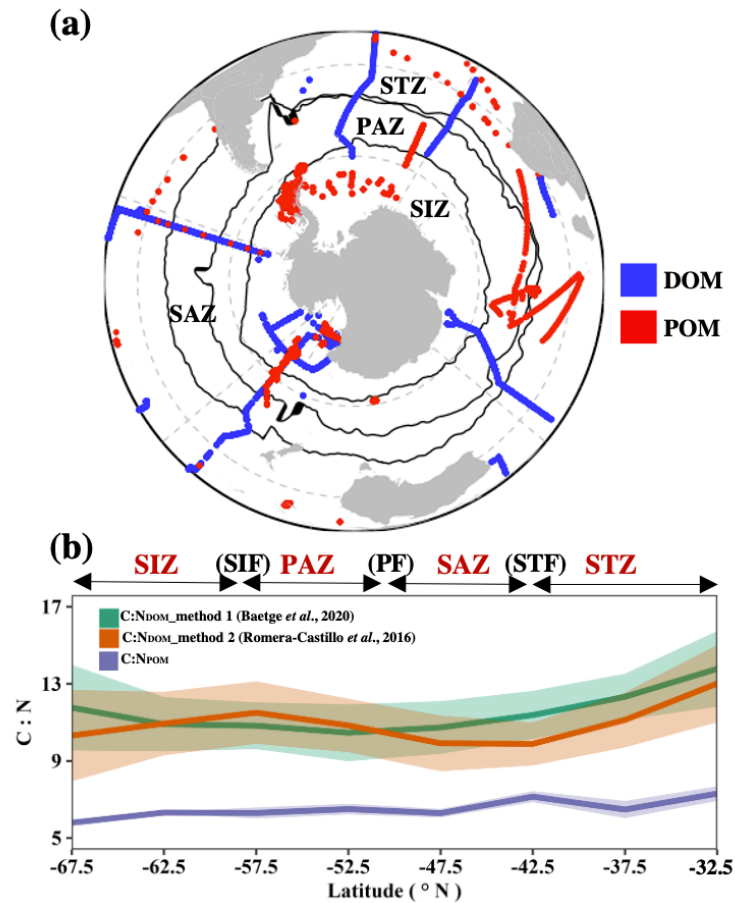

593  
 594  
 595  
 596  
 597  
 598  
 599  
 600

**Fig. S18** (a) Distribution of discrete particulate organic matter (POM) and dissolved organic matter (DOM) observations and the (b) meridional patterns of end-member C:N ratios for POM ( $C:N_{POM}$ ) and DOM ( $C:N_{DOM}$ ) produced during the Southern Ocean productive season. Shading represents the propagated error. Zones as described in Fig. S1.  $C:N_{DOM\_method\ 1}$  and  $C:N_{DOM\_method\ 2}$  represent the results from two different approaches described in Text S1.1.

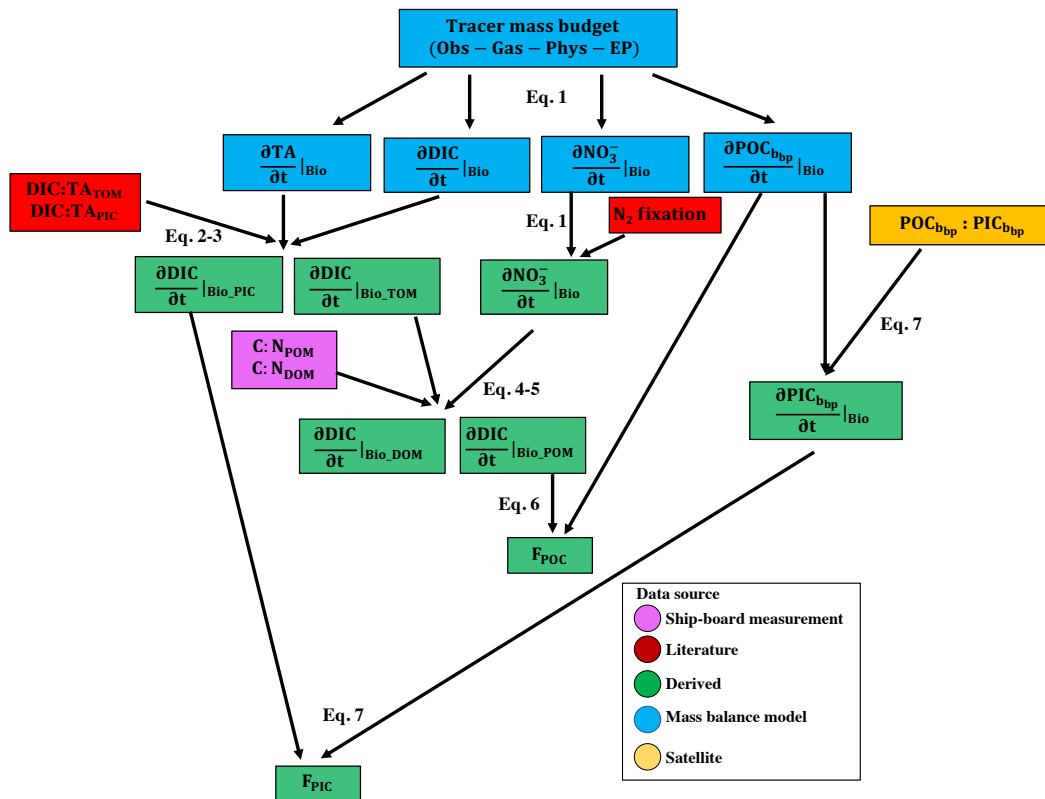

601  
 602  
 603  
 604  
 605  
 606  
 607  
 608  
 609  
 610  
 611  
 612  
 613  
 614  
 615

**Fig. S19** A schematic to depict the workflow and data sources for multiple terms applied in distinct carbon pools partitioning. See detailed descriptions for each term in the method section.

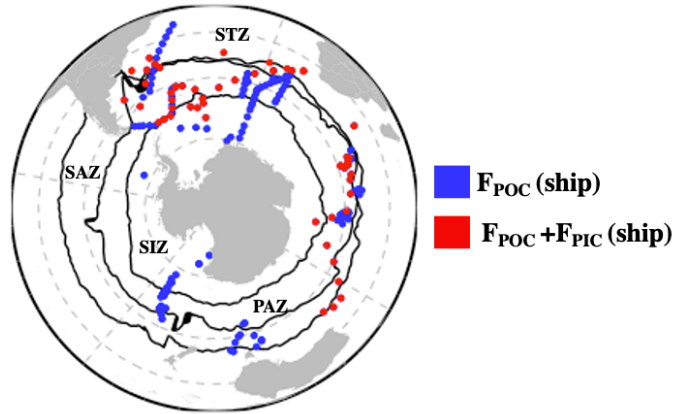

616  
 617 **Fig. S20** Distribution of discrete particulate organic carbon ( $F_{\text{POC}}$ ) and particulate inorganic carbon  
 618 ( $F_{\text{PIC}}$ ) sinking fluxes inferred from measurements of  $^{234}\text{Th}$ - $^{238}\text{U}$  disequilibrium during the Southern  
 619 Ocean productive seasons. See **Text S1.2** for a detailed description of the flux calculation and  
 620 integration adjustment. Zones as described in **Fig. S1**.

621  
 622  
 623  
 624  
 625  
 626  
 627  
 628  
 629  
 630  
 631  
 632  
 633  
 634  
 635

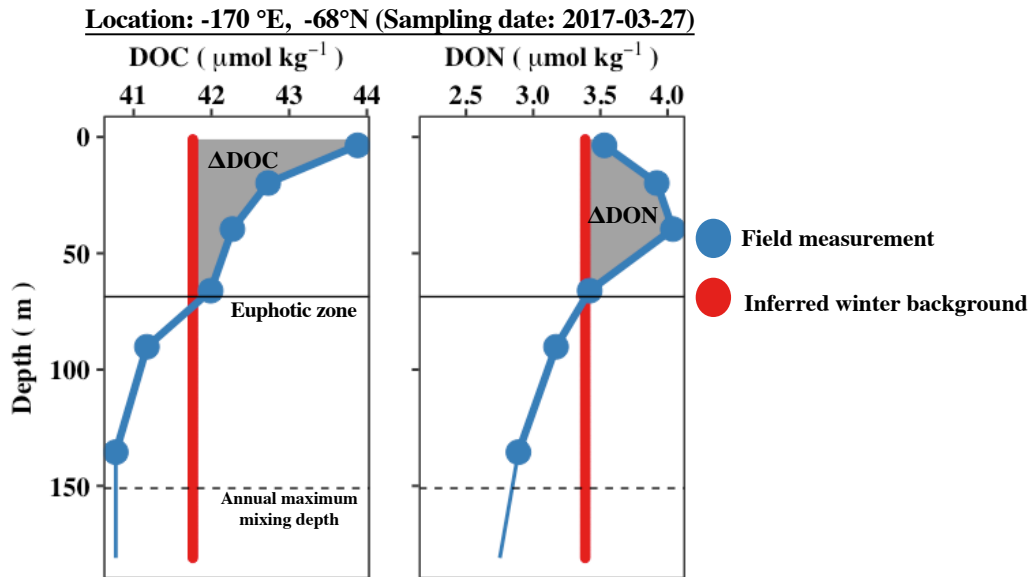

636  
 637 **Fig. S21** An example illustrating the reconstruction of seasonal dissolved organic matter ( $\Delta\text{DOM}$ )  
 638 production ratios based on profiles of dissolved organic carbon (DOC) and dissolved organic  
 639 nitrogen (DON) collected during the stratified summer. Method following Baetge, *et al.* (2).  
 640

641  
 642  
 643  
 644  
 645  
 646  
 647  
 648  
 649  
 650  
 651

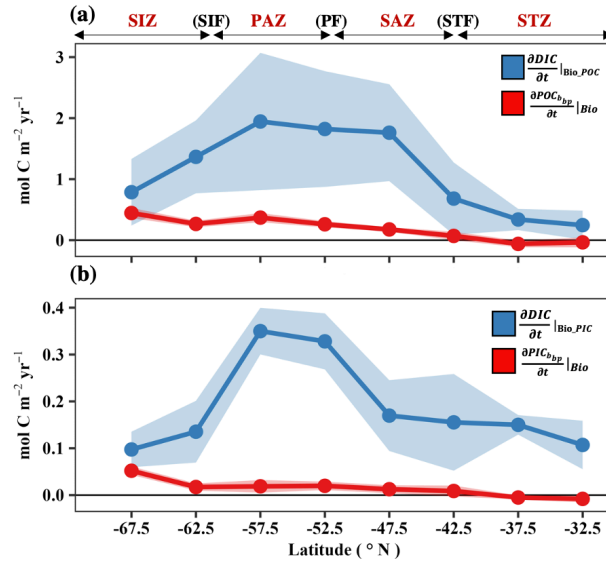

652  
 653  
 654  
 655  
 656  
 657  
 658  
 659  
 660  
 661  
 662  
 663  
 664

**Fig. S22** Meridional pattern (5° bin) of euphotic zone net biological terms solved from suspended particles ( $\frac{\partial \text{POC}_{\text{bp}}}{\partial t} |_{\text{Bio}}$  and  $\frac{\partial \text{PIC}_{\text{bp}}}{\partial t} |_{\text{Bio}}$ ) and the DIC tracer budget ( $\frac{\partial \text{DIC}}{\partial t} |_{\text{Bio\_POC}}$  and  $\frac{\partial \text{DIC}}{\partial t} |_{\text{Bio\_PIC}}$ ) during the Southern Ocean productive season. Shading reflects the propagated error. Zones as described in **Fig. S1**. POC: particulate organic carbon; PIC: particulate inorganic carbon.

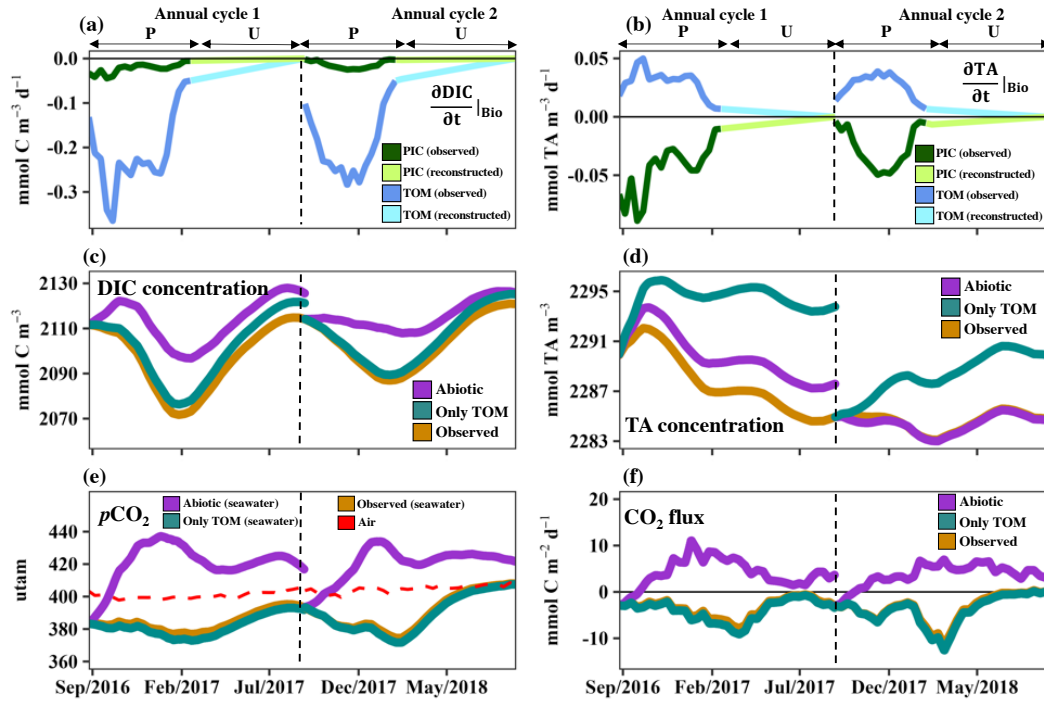

665  
 666 **Fig. S23** Time-series of (a) biologically-induced dissolved inorganic carbon (DIC) change, (b)  
 667 biologically-induced total alkalinity (TA) change, (c) DIC concentration, (d) TA concentration, (e)  
 668 partial pressure of carbon dioxide ( $p\text{CO}_2$ ), and (f) air-sea  $\text{CO}_2$  gas flux over two annual cycles for  
 669 a representative biogeochemical float (WMO ID: 5904761) under three different productivity  
 670 scenarios: observed, abiotic, and total organic matter production only. Reconstructions of  
 671 productivity during the unproductive (U) period are based on the fraction of total production  
 672 occurring during the productive (P) period in B-SOSE model output (*Materials and Methods* in  
 673 main text).

674  
 675  
 676  
 677  
 678  
 679  
 680  
 681  
 682  
 683



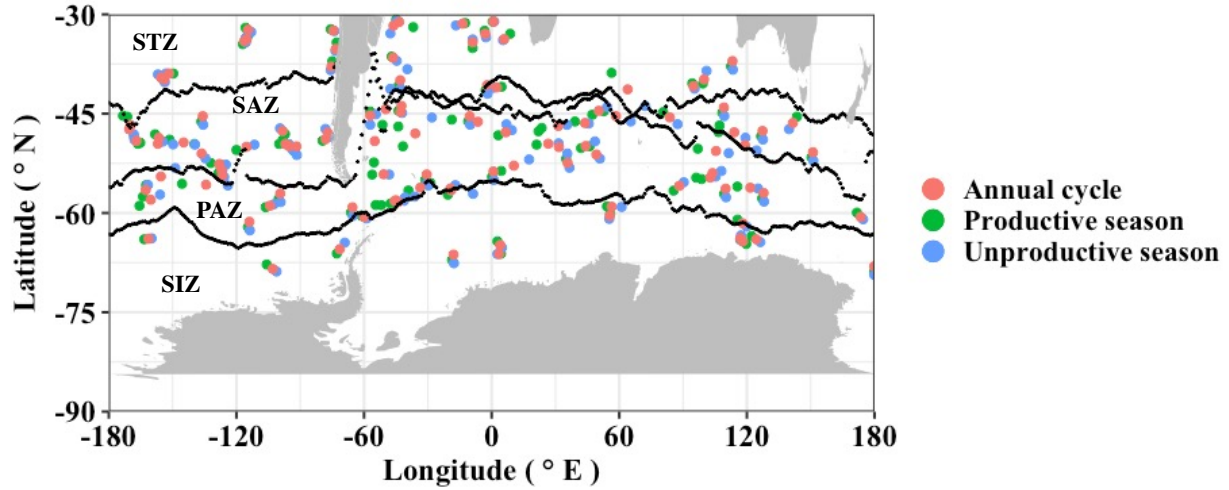

684  
 685  
 686  
 687  
 688  
 689  
 690  
 691  
 692  
 693  
 694  
 695  
 696  
 697  
 698  
 699  
 700  
 701  
 702  
 703  
 704  
 705  
 706

**Fig. S24** Mean location of each float during each annual cycle, productive season, or unproductive season. Black lines show the climatological locations (mean of 2004–2014) of Southern Ocean fronts determined using an Argo-based climatology of temperature and salinity (32). Zones as described in **Fig. S1**.

707 **Table S1.** List of World Meteorological Organization identification numbers (WMO IDs) for the  
708 biogeochemical floats used in this study.  
709

| No. | WMO ID  |
|-----|---------|-----|---------|-----|---------|-----|---------|
| 1   | 5904188 | 21  | 5904686 | 41  | 5905135 | 61  | 5906244 |
| 2   | 5904395 | 22  | 5904693 | 42  | 5905981 | 62  | 5906245 |
| 3   | 5904396 | 23  | 5904695 | 43  | 5905982 | 63  | 5906250 |
| 4   | 5904468 | 24  | 5904761 | 44  | 5905995 |     |         |
| 5   | 5904469 | 25  | 5904765 | 45  | 5905996 |     |         |
| 6   | 5904470 | 26  | 5904766 | 46  | 5905997 |     |         |
| 7   | 5904473 | 27  | 5904768 | 47  | 5905998 |     |         |
| 8   | 5904657 | 28  | 5904842 | 48  | 5906003 |     |         |
| 9   | 5904658 | 29  | 5904844 | 49  | 5906007 |     |         |
| 10  | 5904659 | 30  | 5904854 | 50  | 5906031 |     |         |
| 11  | 5904660 | 31  | 5904856 | 51  | 5906032 |     |         |
| 12  | 5904661 | 32  | 5904857 | 52  | 5906204 |     |         |
| 13  | 5904662 | 33  | 5904980 | 53  | 5906208 |     |         |
| 14  | 5904663 | 34  | 5904982 | 54  | 5906209 |     |         |
| 15  | 5904673 | 35  | 5905075 | 55  | 5906211 |     |         |
| 16  | 5904675 | 36  | 5905105 | 56  | 5906216 |     |         |
| 17  | 5904679 | 37  | 5905109 | 57  | 5906218 |     |         |
| 18  | 5904682 | 38  | 5905131 | 58  | 5906222 |     |         |
| 19  | 5904683 | 39  | 5905132 | 59  | 5906224 |     |         |
| 20  | 5904684 | 40  | 5905134 | 60  | 5906227 |     |         |

710  
711  
712  
713  
714  
715  
716  
717  
718  
719  
720  
721  
722  
723  
724  
725  
726  
727

728 **Table S2** Assignment of uncertainties used in the Monte Carlo error analysis. NO<sub>3</sub><sup>-</sup>: nitrate; TA:  
 729 total alkalinity; POC<sub>bbp</sub>: particulate organic carbon based on backscattering coefficient; Chl-*a*:  
 730 Chlorophyll-*a* concentration based on Chlorophyll-fluorescence; CO<sub>2</sub>: carbon dioxide; MLD:  
 731 mixed layer depth; POM: particulate organic matter; DOM: dissolved organic matter.  
 732

| <b>Variable</b>                          | <b>Uncertainty</b>          | <b>Reference</b>                                               |
|------------------------------------------|-----------------------------|----------------------------------------------------------------|
| pH measurement                           | ±0.005                      | Johnson, <i>et al.</i> (35)                                    |
| NO <sub>3</sub> <sup>-</sup> measurement | ±0.5 μmol kg <sup>-1</sup>  | Johnson, <i>et al.</i> (20)                                    |
| TA estimates                             | ± 4.5 μmol kg <sup>-1</sup> | Bittig, <i>et al.</i> (11)                                     |
| POC <sub>bbp</sub> estimates             | ±30%                        | Graff, <i>et al.</i> (36)                                      |
| Chl- <i>a</i> estimates                  | 20%                         | Johnson, <i>et al.</i> (20)                                    |
| CO <sub>2</sub> gas model                | ±30%                        | Bender, <i>et al.</i> (25), Wanninkhof (26)                    |
| Background eddy diffusivity coefficient  | ±35%                        | Yang, <i>et al.</i> (23)                                       |
| Ekman pumping velocity                   | ±50%                        | Haskell, <i>et al.</i> (37)                                    |
| Thickness of MLD                         | ±0.5 m                      | Vertical resolution/4                                          |
| Thickness of euphotic zone               | 5-15 m                      | Spatial variability at each latitude band ( <b>Fig. S1a</b> )  |
| C:N ratio for POM/DOM production         | 0.5-2.5                     | Spatial variability at each latitude band ( <b>Fig. S18a</b> ) |
| Model-simulated N <sub>2</sub> fixation  | 10-30%                      | Spatial variability at each latitude band ( <b>Fig. S17a</b> ) |

733

**Table S3** Summary of ancillary parameters used in this study.

| Parameters                                                                              | Description                                                                                                                                                | Reference /Link                                                                                                                                                                                                                                                | Usage                                                                                                        |
|-----------------------------------------------------------------------------------------|------------------------------------------------------------------------------------------------------------------------------------------------------------|----------------------------------------------------------------------------------------------------------------------------------------------------------------------------------------------------------------------------------------------------------------|--------------------------------------------------------------------------------------------------------------|
| <b>Parameters used to partition carbon pools and in tracer budget closure</b>           |                                                                                                                                                            |                                                                                                                                                                                                                                                                |                                                                                                              |
| Ice coverage                                                                            | Monthly surface ice coverage; 25 km resolution                                                                                                             | Global Sea Ice Concentration Climate Data<br>( <a href="https://cds.climate.copernicus.eu/cdsapp#!/dataset/satellite-sea-ice-concentration?tab=overview">https://cds.climate.copernicus.eu/cdsapp#!/dataset/satellite-sea-ice-concentration?tab=overview</a> ) | Scale the air-sea CO <sub>2</sub> exchange by ice fraction                                                   |
| Euphotic zone depth (Zeu)                                                               | Remote-sensed daily surface property. MODIS; 0.83°×0.083°; Level 3                                                                                         | Ocean color<br>( <a href="https://oceandata.sci.gsfc.nasa.gov/directdataaccess/Level-3%20Mapped/Aqua-MODIS">https://oceandata.sci.gsfc.nasa.gov/directdataaccess/Level-3%20Mapped/Aqua-MODIS</a> )                                                             | Determine the Zeu                                                                                            |
| Wind stress                                                                             | Daily surface wind stress; 0.25° × 0.25°                                                                                                                   | Advanced Scatterometer product<br>( <a href="https://manati.star.nesdis.noaa.gov/datasets/ASCATData.php">https://manati.star.nesdis.noaa.gov/datasets/ASCATData.php</a> )                                                                                      | Calculate the Ekman pumping velocity                                                                         |
| Wind speed                                                                              | Daily values; 0.16°×0.16°                                                                                                                                  | NCEP-DOE reanalysis: II<br>( <a href="https://psl.noaa.gov/data/gridded/data.ncep.reanalysis2.html">https://psl.noaa.gov/data/gridded/data.ncep.reanalysis2.html</a> )                                                                                         | Calculate the atmospheric pCO <sub>2</sub> and air-sea CO <sub>2</sub> fluxes                                |
| Air pressure                                                                            |                                                                                                                                                            |                                                                                                                                                                                                                                                                |                                                                                                              |
| Relative humidity                                                                       |                                                                                                                                                            |                                                                                                                                                                                                                                                                |                                                                                                              |
| N <sub>2</sub> fixation                                                                 | Monthly climatology simulated from inverse biogeochemical and prognostic ocean models; 1°×1°; 24 depth interval                                            | Wang, <i>et al.</i> (34)                                                                                                                                                                                                                                       | Correct NO <sub>3</sub> <sup>-</sup> potential export                                                        |
| Particulate inorganic carbon (PIC)                                                      | Daily surface properties; 0.83°×0.083°; Level 3                                                                                                            | Ocean color<br>( <a href="https://oceandata.sci.gsfc.nasa.gov/directdataaccess/Level-3%20Mapped/Aqua-MODIS">https://oceandata.sci.gsfc.nasa.gov/directdataaccess/Level-3%20Mapped/Aqua-MODIS</a> )                                                             | Derive the PIC:POC ratio to estimate seawater PIC inventory                                                  |
| Particulate organic carbon (POC)                                                        |                                                                                                                                                            |                                                                                                                                                                                                                                                                |                                                                                                              |
| Dissolved organic matter (DOM)                                                          | Global compilation of dissolved organic carbon (DOC) and dissolved organic nitrogen (DON=total dissolved nitrogen – total inorganic nitrogen) observations | Hansell <i>et al.</i> , (2021)<br>( <a href="https://www.ncei.noaa.gov/access/metadata/landing-page/bin/iso?id=gov.noaa.nodc:0227166">https://www.ncei.noaa.gov/access/metadata/landing-page/bin/iso?id=gov.noaa.nodc:0227166</a> )                            | Constrain the end-member C:N ratio of DOM and POM produced                                                   |
| Particulate organic matter (POM)                                                        | Global compilation of suspended particulate organic carbon (POC) and particulate organic nitrogen (PON) observations                                       | Martiny, <i>et al.</i> (38)<br>( <a href="https://www.bco-dmo.org/dataset/526747">https://www.bco-dmo.org/dataset/526747</a> )                                                                                                                                 |                                                                                                              |
| <b>Parameters used to validate or compare with float analysis</b>                       |                                                                                                                                                            |                                                                                                                                                                                                                                                                |                                                                                                              |
| Particulate organic/inorganic carbon sinking flux (F <sub>POC</sub> /F <sub>PIC</sub> ) | Compilation of POC and PIC sinking fluxes inferred from <sup>2234</sup> Th- <sup>238</sup> U                                                               | Henson, <i>et al.</i> (5), Le Moigne, <i>et al.</i> (6), Rosengard, <i>et al.</i> (7)                                                                                                                                                                          | Compare with the float estimate                                                                              |
| Export potential of organic carbon                                                      | Monthly climatology (2013-2021); 0.16°×0.16°                                                                                                               | Biogeochemical Southern Ocean State Estimate (B-SOSE)<br>( <a href="http://sose.ucsd.edu/">http://sose.ucsd.edu/</a> ) (31)                                                                                                                                    | Evaluate the representativeness of the spatial variability of carbon export derived from the float locations |
| <b>Parameters used to analyze light and nutrient availability</b>                       |                                                                                                                                                            |                                                                                                                                                                                                                                                                |                                                                                                              |

|                                              |                                                                                  |                                                                                                                                                                                                    |                                                                                       |
|----------------------------------------------|----------------------------------------------------------------------------------|----------------------------------------------------------------------------------------------------------------------------------------------------------------------------------------------------|---------------------------------------------------------------------------------------|
| Dissolved iron (dFe) concentration           | Monthly climatology simulated from a data-driven model; 1°×1°; 33 depth interval | Huang, <i>et al.</i> (12)<br>( <a href="https://zenodo.org/record/6994318#.Y0m2fuzMLjk">https://zenodo.org/record/6994318#.Y0m2fuzMLjk</a> )                                                       | Analyze the meridional pattern of dFe                                                 |
| SiO <sub>4</sub> <sup>-</sup> concentration  | Estimated from float temperature, salinity, and dissolved oxygen observations    | Canyon-B algorithm (11)                                                                                                                                                                            | Analyze the meridional pattern of SiO <sub>4</sub> <sup>-</sup> dependent growth rate |
| Photosynthetically available radiation (PAR) | Remote-sensed daily surface properties; MODIS; 083°×0.083°; Level 3              | Ocean color<br>( <a href="https://oceandata.sci.gsfc.nasa.gov/directdataaccess/Level-3%20Mapped/Aqua-MODIS">https://oceandata.sci.gsfc.nasa.gov/directdataaccess/Level-3%20Mapped/Aqua-MODIS</a> ) | Analyze the meridional pattern of light availability                                  |

736  
737  
738  
739  
740  
741  
742  
743  
744  
745  
746  
747  
748  
749  
750  
751  
752  
753  
754  
755  
756  
757  
758  
759  
760  
761  
762  
763  
764  
765  
766  
767  
768  
769  
770  
771  
772

773 **References**

774

- 775 1. D. A. Hansell, M. V. Orellana, Dissolved organic matter in the global ocean: A primer.  
776 *Gels* **7** (2021).
- 777 2. N. Baetge, J. R. Graff, M. J. Behrenfeld, C. A. Carlson, Net community production,  
778 dissolved organic carbon accumulation, and vertical export in the western North Atlantic.  
779 *Frontiers in Marine Science* **7** (2020).
- 780 3. J. Holte, L. D. Talley, J. Gilson, D. Roemmich, An Argo mixed layer climatology and  
781 database. *Geophysical Research Letters* **44**, 5618-5626 (2017).
- 782 4. C. Romera-Castillo, R. T. Letscher, D. A. Hansell, New nutrients exert fundamental control  
783 on dissolved organic carbon accumulation in the surface Atlantic Ocean. *Proceedings of*  
784 *the National Academy of Sciences* **113**, 10497-10502 (2016).
- 785 5. S. Henson, F. Le Moigne, S. Giering, Drivers of carbon export efficiency in the global  
786 ocean. *Global Biogeochem Cycles* **33**, 891-903 (2019).
- 787 6. F. A. Le Moigne, K. Pabortsava, C. L. Marcinko, P. Martin, R. J. Sanders, Where is mineral  
788 ballast important for surface export of particulate organic carbon in the ocean? *Geophys*  
789 *Res Lett* **41**, 8460-8468 (2014).
- 790 7. S. Z. Rosengard *et al.*, Carbon export and transfer to depth across the Southern Ocean Great  
791 Calcite Belt. *Biogeosciences* **12**, 3953-3971 (2015).
- 792 8. J. H. Martin, G. A. Knauer, D. M. Karl, W. W. Broenkow, VERTEX: carbon cycling in  
793 the northeast Pacific. *Deep-Sea Res* **34**, 267-285 (1987).
- 794 9. W. M. Balch *et al.*, Factors regulating the Great Calcite Belt in the Southern Ocean and its  
795 biogeochemical significance. *Global Biogeochemical Cycles* **30**, 1124-1144 (2016).
- 796 10. I. Salter *et al.*, Carbonate counter pump stimulated by natural iron fertilization in the Polar  
797 Frontal Zone. *Nature Geoscience* **7**, 885-889 (2014).
- 798 11. H. C. Bittig *et al.*, An alternative to static climatologies: robust estimation of open ocean  
799 CO<sub>2</sub> variables and nutrient concentrations from T, S, and O<sub>2</sub> data using Bayesian Neural  
800 Networks. *Frontiers in Marine Science* **5** (2018).
- 801 12. Y. Huang, A. Tagliabue, N. Cassar, Data-driven modeling of dissolved iron in the global  
802 ocean. *Frontiers in Marine Science* **9** (2022).
- 803 13. A. R. Gray *et al.*, Autonomous biogeochemical floats detect significant carbon dioxide  
804 outgassing in the high-latitude Southern Ocean. *Geophysical Research Letters* **45**, 9049-  
805 9057 (2018).
- 806 14. S. M. Bushinsky *et al.*, Reassessing Southern Ocean air-Sea CO<sub>2</sub> flux estimates with the  
807 addition of biogeochemical float observations. *Global Biogeochem Cycles* **33**, 1370-1388  
808 (2019).
- 809 15. S. Stammerjohn *et al.*, Antarctica and the Southern Ocean. *Bulletin of the American*  
810 *Meteorological Society* **102**, S317-S356 (2021).
- 811 16. P. Landschützer, N. Gruber, D. C. E. Bakker, Decadal variations and trends of the global  
812 ocean carbon sink. *Global Biogeochemical Cycles* **30**, 1396-1417 (2016).
- 813 17. P. Landschützer, N. Gruber, D. C. E. Bakker, U. Schuster, Recent variability of the global  
814 ocean carbon sink. *Global Biogeochemical Cycles* **28**, 927-949 (2014).
- 815 18. C. J. Prend *et al.*, Indo-Pacific Sector Dominates Southern Ocean Carbon Outgassing.  
816 *Global Biogeochemical Cycles* **36** (2022).
- 817 19. M. C. Long *et al.*, Strong Southern Ocean carbon uptake evident in airborne observations.  
818 *Science* **374**, 1275-1280 (2021).

- 819 20. K. S. Johnson *et al.*, Biogeochemical sensor performance in the SOCCOM profiling float  
820 array. *Journal of Geophysical Research: Oceans* **122**, 6416-6436 (2017).
- 821 21. C. de Boyer Montégut, G. Madec, A. S. Fischer, A. Lazar, D. Iudicone, Mixed layer depth  
822 over the global ocean: an examination of profile data and a profile-based climatology.  
823 *Journal of Geophysical Research-Oceans* **109**, C12003 (2004).
- 824 22. S. R. Signorini, C. R. McClain, J. R. Christian, C. S. Wong, Seasonal and interannual  
825 variability of phytoplankton, nutrients, TCO<sub>2</sub>, pCO<sub>2</sub>, and O<sub>2</sub> in the eastern subarctic Pacific  
826 (ocean weather station Papa). *Journal of Geophysical Research: Oceans* **106**, 31197-31215  
827 (2001).
- 828 23. B. Yang, S. R. Emerson, S. M. Bushinsky, Annual net community production in the  
829 subtropical Pacific Ocean from *in-situ* oxygen measurements on profiling floats. *Global*  
830 *Biogeochemical Cycles* **31**, 728–744 (2017).
- 831 24. O. M. Sun, S. R. Jayne, K. L. Polzin, B. A. Rahter, L. C. St. Laurent, Scaling turbulent  
832 dissipation in the transition layer. *Journal of Physical Oceanography* **43**, 2475-2489 (2013).
- 833 25. M. L. Bender, S. Kinter, N. Cassar, R. Wanninkhof, Evaluating gas transfer velocity  
834 parameterizations using upper ocean radon distributions. *Journal of Geophysical Research:*  
835 *Oceans* **116** (2011).
- 836 26. R. Wanninkhof, Relationship between wind speed and gas exchange over the ocean  
837 revisited. *Limnology and Oceanography: Methods* **12**, 351-362 (2014).
- 838 27. B. R. Carter, J. A. Radich, H. L. Doyle, A. G. Dickson, An automated system for  
839 spectrophotometric seawater pH measurements. *Limnology and Oceanography: Methods*  
840 **11**, 16-27 (2013).
- 841 28. N. L. Williams *et al.*, Calculating surface ocean pCO<sub>2</sub> from biogeochemical Argo floats  
842 equipped with pH: An uncertainty analysis. *Global Biogeochemical Cycles* **31**, 591-604  
843 (2017).
- 844 29. B. R. Carter *et al.*, Updated methods for global locally interpolated estimation of alkalinity,  
845 pH, and nitrate. *Limnology and Oceanography: Methods* **16**, 119-131 (2018).
- 846 30. A. Morel *et al.*, Examining the consistency of products derived from various ocean color  
847 sensors in open ocean (Case 1) waters in the perspective of a multi-sensor approach.  
848 *Remote Sensing of Environment* **111**, 69-88 (2007).
- 849 31. A. Verdy, M. R. Mazloff, A data assimilating model for estimating Southern Ocean  
850 biogeochemistry. *Journal of Geophysical Research: Oceans* **122**, 6968-6988 (2017).
- 851 32. D. Roemmich, J. Gilson, The 2004–2008 mean and annual cycle of temperature, salinity,  
852 and steric height in the global ocean from the Argo Program. *Progress in Oceanography*  
853 **82**, 81-100 (2009).
- 854 33. D. C. E. Bakker *et al.*, A multi-decade record of high-quality fCO<sub>2</sub> data in version 3 of the  
855 Surface Ocean CO<sub>2</sub> Atlas (SOCAT). *Earth System Science Data* **8**, 383-413 (2016).
- 856 34. W. L. Wang, J. K. Moore, A. C. Martiny, F. W. Primeau, Convergent estimates of marine  
857 nitrogen fixation. *Nature* **566**, 205-211 (2019).
- 858 35. K. S. Johnson *et al.*, Deep-Sea DuraFET: A pressure tolerant pH sensor designed for global  
859 sensor networks. *Analytical chemistry* **88**, 3249-3256 (2016).
- 860 36. J. R. Graff *et al.*, Analytical phytoplankton carbon measurements spanning diverse  
861 ecosystems. *Deep Sea Research Part I: Oceanographic Research Papers* **102**, 16-25  
862 (2015).

- 863 37. W. Z. Haskell, A. J. Fassbender, J. S. Long, J. N. Plant, Annual net community production  
864 of particulate and dissolved organic carbon from a decade of biogeochemical profiling float  
865 observations in the Northeast Pacific. *Global Biogeochemical Cycles* **34** (2020).
- 866 38. A. C. Martiny, J. A. Vrugt, M. W. Lomas, Concentrations and ratios of particulate organic  
867 carbon, nitrogen, and phosphorus in the global ocean. *Sci Data* **1**, 140048 (2014).  
868
